# Supplementary material for: IBX-promoted domino reaction of α-hydroxy amides: a facile one-pot synthesis of isatins
Source: Royal Society of Chemistry journal article supplement (doi:10.1039/c5ra25036f), 2015-12-22

## Supporting Information

### IBX-promoted domino reaction of $\alpha$ -hydroxy amides: A facile one-pot synthesis of isatins

Yaoling Wang, Xu Cheng, Zhen Zhan, Xiaojun Ma, Ruifang Nie, Li Hai\* and Yong Wu\*

*Key Laboratory of Drug-Targeting of Education Ministry and Department of Medicinal Chemistry,  
West China School of Pharmacy, Sichuan University, Chengdu, 610041, P. R. of China.*

*E-mail: [wuyong@scu.edu.cn](mailto:wuyong@scu.edu.cn) & [smile@scu.edu.cn](mailto:smile@scu.edu.cn)*

#### Tables of Contents:

|                                                                             |            |
|-----------------------------------------------------------------------------|------------|
| <b>1. General Details.....</b>                                              | <b>S2</b>  |
| <b>2. Experimental Procedure and Analytical Data of Products.....</b>       | <b>S2</b>  |
| <b>2.1. General procedure for the synthesis of 2.....</b>                   | <b>S2</b>  |
| <b>2.2. General procedure for the synthesis of 3.....</b>                   | <b>S2</b>  |
| <b>2.3. Spectroscopic characterization data of products.....</b>            | <b>S3</b>  |
| <b>3. References .....</b>                                                  | <b>S12</b> |
| <b>4. <sup>1</sup>H NMR and <sup>13</sup>C NMR Spectra of Products.....</b> | <b>S13</b> |

## 1. General details

All the reactions were monitored by thin-layer chromatography (TLC) and were visualized using UV light. The product purification was done using silica gel column chromatography. Thin layer chromatography (TLC) characterization was performed with precoated silica gel GF254 (0.2mm), while column chromatography characterization was performed with silica gel (100-200mesh).  $^1\text{H}$  and  $^{13}\text{C}$  NMR spectra were recorded with tetramethylsilane as the internal standard.  $^1\text{H}$  NMR spectra were recorded at 400 or 600 MHz (Varian) and  $^{13}\text{C}$  NMR spectra were recorded 150 MHz (Varian). Chemical shifts are reported in ppm downfield from  $\text{CDCl}_3$  ( $\delta = 7.26$  ppm) for  $^1\text{H}$  NMR and relative to the central  $\text{CDCl}_3$  resonance ( $\delta = 77.0$  ppm) for  $^{13}\text{C}$  NMR spectroscopy. Coupling constants are given in Hz. Melting points were measured with YRT-3 melting point apparatus (Shantou Keyi Instrument & Equipment Co., Ltd., Shantou, China). High resolution mass spectroscopy data of the products were collected on a Waters Micromass GCT or a Bruker Apex IV FTMS instrument. All the  $\alpha$ -hydroxy amides **1** were prepared according to the reported procedures.<sup>[1]</sup>

## 2. Experimental Procedure and Analytical Data of Products

### 2.1 General procedure for the synthesis of 2

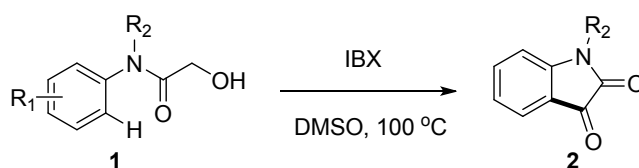

A mixture of  $\alpha$ -hydroxy amides **1** (1 mmol) and IBX (1 mmol) were added in 2 ml DMSO and then stirred under air at 100 °C for 3h. After the completion of the reaction (monitored by TLC), the mixture was cooled to room temperature, diluted with water and extracted with ethyl acetate (10 ml x 3). The organic layer was washed with saturated brine, dried over anhydrous sodium sulfate and the solvent was evaporated to dryness. The crude residue was purified by flash chromatography on silica (PE/EA=10/1) to afford pure isatins **2** as a red solid.

### 2.2 General procedure for the synthesis of 3

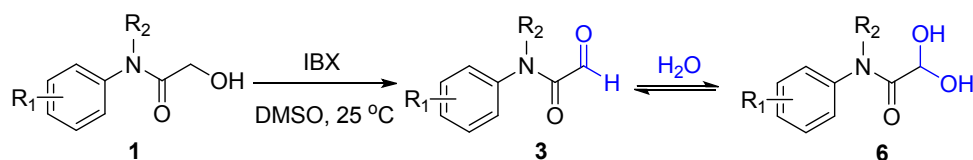

A mixture of  $\alpha$ -hydroxy amides **1** (1 mmol) and IBX (1 mmol) were added in 2 ml DMSO and then stirred under air at 25 °C for 3h. After the completion of the reaction (monitored by TLC), the mixture was diluted with water and extracted with ethyl acetate (10 ml x 3). The organic layer was washed with saturated brine, dried over anhydrous sodium sulfate and the solvent was

evaporated to dryness. The crude residue was purified by flash chromatography on silica (PE/EA=5/1) to afford pure **3**.

Notably, because of  $\alpha$ -formyl amide's strong ability of absorbing water, the NMR spectral data of  $\alpha$ -formyl amides actually is the data of a mixture of **3** and **6** (see pages 10-11 and 32-35).

## 2.3 Characterization data for compounds 2

### 1-methylindoline-2,3-dione (**2a**)

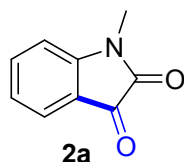

Yield 91%; red solid; mp. 130-133 °C;  $^1\text{H}$  NMR (400 MHz,  $\text{CDCl}_3$ ):  $\delta$  7.64-7.58 (m, 2H), 7.15-7.11 (m, 1H), 6.92 (d,  $J = 8.0$  Hz, 1H), 3.26 (s, 3H);  $^{13}\text{C}$  NMR ( $\text{CDCl}_3$ , 150 MHz):  $\delta$  183.3, 158.1, 151.4, 138.4, 125.1, 123.8, 117.3, 109.9, 26.2; HRMS (ESI):  $m/z$  [ $\text{M} + \text{Na}^+$ ] calcd for  $\text{C}_9\text{H}_7\text{NO}_2 + \text{Na}^+$  184.0374, found 184.0370.

### 1-ethylindoline-2,3-dione (**2b**)

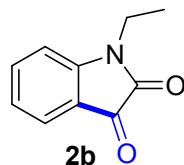

Yield 91%; red solid; mp. 92-94 °C;  $^1\text{H}$  NMR (400 MHz,  $\text{CDCl}_3$ ):  $\delta$  7.62-7.58 (m, 2H), 7.14-7.10 (m, 1H), 6.93-6.91 (m, 1H), 3.80 (q,  $J = 7.6$  Hz, 2H), 1.32 (t,  $J = 7.6$  Hz, 3H);  $^{13}\text{C}$  NMR ( $\text{CDCl}_3$ , 150 MHz):  $\delta$  182.3, 158.3, 151.4, 138.2, 125.2, 123.9, 117.0, 109.6, 36.0, 14.4; HRMS (ESI):  $m/z$  [ $\text{M} + \text{Na}^+$ ] calcd for  $\text{C}_{10}\text{H}_9\text{NO}_2 + \text{Na}^+$  198.0531, found 198.0534.

### 1-butyldindoline-2,3-dione (**2c**)

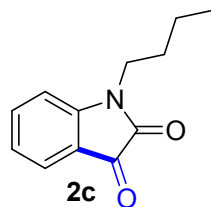

Yield 91%; red solid; mp. 35-36 °C;  $^1\text{H}$  NMR (400 MHz,  $\text{CDCl}_3$ ):  $\delta$  7.61-7.57 (m, 2H), 7.13-7.09 (m, 1H), 6.91-6.88 (m, 1H), 3.76-3.71 (m, 2H), 1.73-1.64 (m, 2H), 1.61-1.55 (m, 1H), 1.44-1.39 (m, 1H), 0.99 (t,  $J = 6.4$  Hz, 3H);  $^{13}\text{C}$  NMR ( $\text{CDCl}_3$ , 150 MHz):  $\delta$  183.4, 158.5, 151.3, 138.5, 125.1, 123.5, 116.9, 109.8, 43.1, 31.0, 20.7, 13.8; HRMS (ESI):  $m/z$  [ $\text{M} + \text{Na}^+$ ] calcd for  $\text{C}_{12}\text{H}_{13}\text{NO}_2 + \text{Na}^+$  226.0844, found 226.0842.

### 1-allyldindoline-2,3-dione (**2d**)

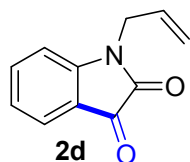

Yield 74%; red solid; mp. 89-90 °C; <sup>1</sup>H NMR (600 MHz, CDCl<sub>3</sub>): δ 7.62 (d, *J* = 7.2 Hz, 1H), 7.58-7.56 (m, 1H), 7.14-7.11 (m, 1H), 6.90 (d, *J* = 7.8 Hz, 1H), 5.88-5.82 (m, 1H), 5.31-5.29 (m, 2H), 4.37 (d, *J* = 5.4 Hz, 2H); <sup>13</sup>C NMR (CDCl<sub>3</sub>, 150 MHz): δ 183.2, 157.8, 150.8, 138.3, 130.3, 125.4, 123.8, 118.6, 117.5, 110.8, 42.5; HRMS (ESI): *m/z* [M + Na<sup>+</sup>] calcd for C<sub>11</sub>H<sub>9</sub>NO<sub>2</sub>+Na<sup>+</sup> 210.0531, found 210.0531.

#### 1-(4-methoxybenzyl)indoline-2,3-dione (2e)

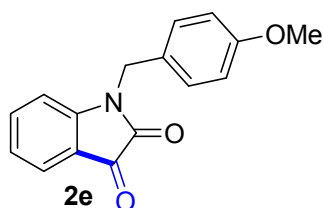

Yield 90%; red solid; mp. 169-171 °C; <sup>1</sup>H NMR (400 MHz, CDCl<sub>3</sub>): δ 7.59 (d, *J* = 6.8 Hz, 1H), 7.51-7.46 (m, 1H), 7.27 (d, *J* = 8.8 Hz, 2H), 7.10-7.06 (m, 1H), 6.87 (d, *J* = 8.8 Hz, 2H), 6.81 (d, *J* = 8.0 Hz, 1H), 4.86 (s, 2H), 3.78 (s, 3H); <sup>13</sup>C NMR (CDCl<sub>3</sub>, 150 MHz): δ 183.3, 159.4, 158.2, 150.7, 138.2, 128.9, 126.4, 125.3, 123.7, 117.6, 114.3, 111.0, 55.2, 43.5; HRMS (ESI): *m/z* [M + Na<sup>+</sup>] calcd for C<sub>16</sub>H<sub>13</sub>NO<sub>3</sub>+Na<sup>+</sup> 290.0793, found 290.0790.

#### 1,5-dimethylindoline-2,3-dione (2f)

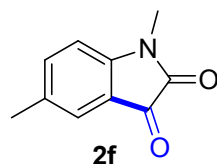

Yield 93%; red solid; mp. 149-150 °C; <sup>1</sup>H NMR (400 MHz, CDCl<sub>3</sub>): δ 7.42-7.28 (m, 2H), 6.79 (d, *J* = 8.0 Hz, 1H), 3.23 (s, 3H), 2.34 (s, 3H); <sup>13</sup>C NMR (CDCl<sub>3</sub>, 150 MHz): δ 182.2, 158.7, 151.5, 150.7, 125.3, 124.4, 115.2, 110.8, 26.2, 22.9; HRMS (ESI): *m/z* [M + Na<sup>+</sup>] calcd for C<sub>10</sub>H<sub>9</sub>NO<sub>2</sub>+Na<sup>+</sup> 198.0531, found 198.0535.

#### 5-methoxy-1-methylindoline-2,3-dione (2g)

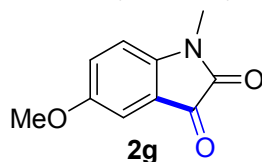

Yield 97%; red solid; mp. 175-176 °C; <sup>1</sup>H NMR (400 MHz, CDCl<sub>3</sub>): δ 7.17-7.15 (m, 2H), 6.82 (d, *J* = 8.0 Hz, 1H), 3.81 (s, 3H), 3.23 (s, 3H); <sup>13</sup>C NMR (CDCl<sub>3</sub>, 150 MHz): δ 183.8, 158.2, 156.6, 145.7, 124.0, 117.8, 110.9, 109.8, 55.5, 26.1; HRMS (ESI): *m/z* [M + Na<sup>+</sup>] calcd for C<sub>10</sub>H<sub>9</sub>NO<sub>3</sub>+Na<sup>+</sup> 214.0480, found 214.0482.

#### 5-chloro-1-methylindoline-2,3-dione (2h)

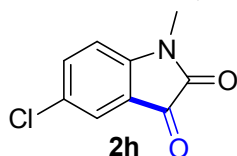

Yield 74%; red solid; mp. 171-173 °C; <sup>1</sup>H NMR (400 MHz, CDCl<sub>3</sub>): δ 7.59-7.56 (m, 2H), 6.86 (d, *J* = 9.2 Hz, 1H), 3.26 (s, 3H); <sup>13</sup>C NMR (CDCl<sub>3</sub>, 150 MHz): δ 181.5, 158.2, 152.2, 144.3, 126.4, 124.0, 115.2, 110.5, 26.5; HRMS (ESI): *m/z* [M + Na<sup>+</sup>] calcd for C<sub>9</sub>H<sub>6</sub>ClNO<sub>2</sub>+Na<sup>+</sup> 217.9985, found 217.9982.

#### 5-bromo-1-methylindoline-2,3-dione (2i)

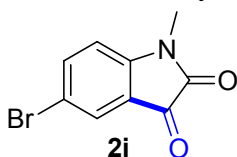

Yield 80%; red solid; mp. 163-164 °C; <sup>1</sup>H NMR (400 MHz, CDCl<sub>3</sub>): δ 7.74-7.70 (m, 2H), 6.82 (d, *J* = 8.0 Hz, 1H), 3.26 (s, 3H); <sup>13</sup>C NMR (CDCl<sub>3</sub>, 150 MHz): δ 182.1, 157.4, 150.1, 140.6, 128.0, 118.5, 116.6, 111.6, 26.3; HRMS (ESI): *m/z* [M + Na<sup>+</sup>] calcd for C<sub>9</sub>H<sub>6</sub>BrNO<sub>2</sub>+Na<sup>+</sup> 261.9480, found 261.9478.

#### 1-methyl-5-nitroindoline-2,3-dione (2j)

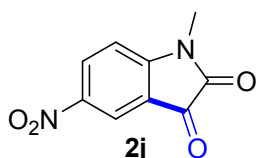

Yield 57%; red solid; mp. 201-202 °C; <sup>1</sup>H NMR (400 MHz, CDCl<sub>3</sub>): δ 7.74-7.71 (m, 2H), 6.82 (d, *J* = 8.0 Hz, 1H), 3.26 (s, 3H); <sup>13</sup>C NMR (CDCl<sub>3</sub>, 150 MHz): δ 182.1, 157.5, 150.1, 140.6, 128.0, 118.5, 116.6, 111.6, 29.6; HRMS (ESI): *m/z* [M + Na<sup>+</sup>] calcd for C<sub>9</sub>H<sub>6</sub>N<sub>2</sub>O<sub>4</sub>+Na<sup>+</sup> 229.0225, found 229.0228.

#### 1,7-dimethylindoline-2,3-dione (2k)

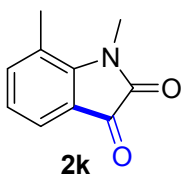

Yield 92%; red solid; mp. 162-164 °C; <sup>1</sup>H NMR (400 MHz, CDCl<sub>3</sub>): δ 7.46 (d, *J* = 7.2 Hz, 1H), 7.33 (d, *J* = 7.6 Hz, 1H), 7.02-6.98 (m, 1H), 3.53 (s, 3H), 2.57 (s, 3H); <sup>13</sup>C NMR (CDCl<sub>3</sub>, 150 MHz): δ 182.7, 158.0, 151.8, 150.5, 125.5, 124.5, 115.5, 110.9, 26.1, 22.9; HRMS (ESI): *m/z* [M + Na<sup>+</sup>] calcd for C<sub>10</sub>H<sub>9</sub>NO<sub>2</sub>+Na<sup>+</sup> 198.0531, found 198.0527.

#### 1-ethyl-7-methylindoline-2,3-dione (2l)

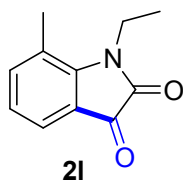

Yield 94%; red solid; mp. 188-190 °C; <sup>1</sup>H NMR (400 MHz, CDCl<sub>3</sub>): δ 7.47 (d, *J* = 7.6 Hz, 1H), 7.34 (d, *J* = 7.2 Hz, 1H), 7.02-6.98 (m, 1H), 4.01 (q, *J* = 7.2 Hz, 2H), 2.54 (s, 3H), 1.34 (t, *J* = 7.2 Hz, 3H); <sup>13</sup>C NMR (CDCl<sub>3</sub>, 150 MHz): δ 184.1, 159.1, 148.4, 142.3, 123.7, 123.5, 121.4, 118.8, 36.9, 18.7, 14.5; HRMS (ESI): *m/z* [M + Na<sup>+</sup>] calcd for C<sub>11</sub>H<sub>11</sub>NO<sub>2</sub>+Na<sup>+</sup> 212.0687, found 212.0683.

#### 1-ethyl-5-methylindoline-2,3-dione (2m)

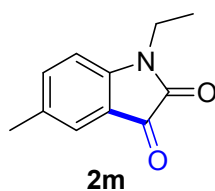

Yield 94%; red solid; mp. 74-76 °C; <sup>1</sup>H NMR (400 MHz, CDCl<sub>3</sub>): δ 7.42-7.38 (m, 2H), 6.80 (d, *J* = 8.0 Hz, 1H), 3.77 (q, *J* = 7.2 Hz, 2H), 2.39 (s, 3H), 1.30 (t, *J* = 7.2 Hz, 3H); <sup>13</sup>C NMR (CDCl<sub>3</sub>, 150 MHz): δ 184.0, 159.2, 148.3, 142.5, 123.2, 123.1, 121.7, 118.2, 36.9, 18.7, 14.5; HRMS (ESI): *m/z* [M + Na<sup>+</sup>] calcd for C<sub>11</sub>H<sub>11</sub>NO<sub>2</sub>+Na<sup>+</sup> 212.0687, found 212.0685.

#### 6-chloro-1-methylindoline-2,3-dione (2n)

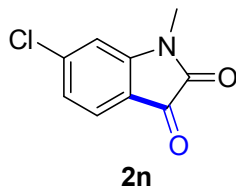

Yield 46%; red solid; mp. 177-178 °C; <sup>1</sup>H NMR (400 MHz, CDCl<sub>3</sub>): δ 7.55 (d, *J* = 8.0 Hz, 1H), 7.12 (dd, *J*<sub>1</sub> = 1.6 Hz, *J*<sub>2</sub> = 8.0 Hz, 1H), 6.91 (d, *J* = 1.6 Hz, 1H), 3.27 (s, 3H); <sup>13</sup>C NMR (CDCl<sub>3</sub>, 150 MHz): δ 181.7, 158.1, 152.4, 144.8, 126.3, 124.0, 115.7, 110.8, 26.4; HRMS (ESI): *m/z* [M + Na<sup>+</sup>] calcd for C<sub>9</sub>H<sub>6</sub>ClNO<sub>2</sub>+Na<sup>+</sup> 217.9985, found 217.9983.

#### 4-chloro-1-methylindoline-2,3-dione (2n')

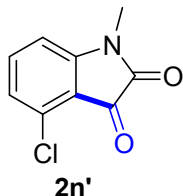

Yield 29%; Red solid; mp. 192-195 °C; <sup>1</sup>H NMR (400 MHz, CDCl<sub>3</sub>): δ 7.53-7.49 (m, 1H), 7.08 (d, *J* = 8.0 Hz, 1H), 6.80 (d, *J* = 7.6 Hz, 1H), 3.27 (s, 3H); <sup>13</sup>C NMR (CDCl<sub>3</sub>, 150 MHz): δ 181.1, 158.3, 152.3, 144.5, 126.2, 124.0, 115.7, 110.5, 26.4; HRMS (ESI): *m/z* [M + Na<sup>+</sup>] calcd for C<sub>9</sub>H<sub>6</sub>ClNO<sub>2</sub>+Na<sup>+</sup> 217.9985, found 217.9981.

#### 6-bromo-1-methylindoline-2,3-dione (2o)

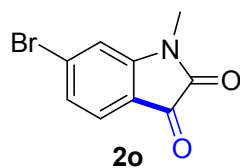

Yield 44.6%; red solid; mp. 118-119 °C; <sup>1</sup>H NMR (400 MHz, CDCl<sub>3</sub>): δ 7.44 (d, *J* = 7.6 Hz, 1H), 7.30 (dd, *J*<sub>1</sub> = 1.6 Hz, *J*<sub>2</sub> = 8.0 Hz, 1H), 7.08 (d, *J* = 1.6 Hz, 1H), 3.25 (s, 3H); <sup>13</sup>C NMR (CDCl<sub>3</sub>, 150 MHz): δ 182.3, 157.4, 150.2, 140.6, 128.1, 118.6, 116.5, 111.7, 26.3; HRMS (ESI): *m/z* [M + Na<sup>+</sup>] calcd for C<sub>9</sub>H<sub>6</sub>BrNO<sub>2</sub>+Na<sup>+</sup> 261.9480, found 261.9484.

#### 4-bromo-1-methylindoline-2,3-dione (2o')

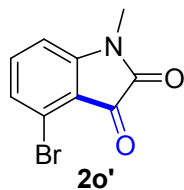

Yield 34.4%; Red solid; mp. 199-200 °C; <sup>1</sup>H NMR (600 MHz, CDCl<sub>3</sub>): δ 7.44-7.41 (m, 1H), 7.26 (d, *J* = 9.0 Hz, 1H), 6.85 (d, *J* = 7.8 Hz, 1H), 3.26 (s, 3H); <sup>13</sup>C NMR (CDCl<sub>3</sub>, 150 MHz): δ 182.0, 157.2, 150.3, 140.3, 128.1, 118.5, 116.6, 111.2, 26.3; HRMS (ESI): *m/z* [M + Na<sup>+</sup>] calcd for C<sub>9</sub>H<sub>6</sub>BrNO<sub>2</sub>+Na<sup>+</sup> 261.9480, found 261.9483.

#### 1,6-dimethylindoline-2,3-dione (2p)

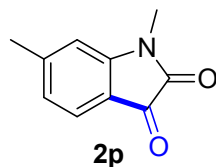

Yield 61%; red solid; mp. 150-151 °C; <sup>1</sup>H NMR (400 MHz, CDCl<sub>3</sub>): δ 7.49 (d, *J* = 7.6 Hz, 1H), 6.93 (d, *J* = 7.6 Hz, 1H), 6.70 (s, 1H), 3.23 (s, 3H), 2.45 (s, 3H); <sup>13</sup>C NMR (CDCl<sub>3</sub>, 150 MHz): δ 182.6, 158.9, 151.8, 150.7, 125.3, 124.4, 115.3, 110.7, 26.1, 22.9; HRMS (ESI): *m/z* [M + Na<sup>+</sup>] calcd for C<sub>10</sub>H<sub>9</sub>NO<sub>2</sub>+Na<sup>+</sup> 198.0531, found 198.0533.

#### 1,4-dimethylindoline-2,3-dione (2p')

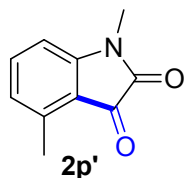

Yield 32%; Red solid; mp. 164-165 °C; <sup>1</sup>H NMR (400 MHz, CDCl<sub>3</sub>): δ 7.46-7.42 (m, 1H), 6.90 (d, *J* = 7.6 Hz, 1H), 6.69 (d, *J* = 8.0 Hz, 1H), 3.24 (s, 3H), 2.57 (s, 3H); <sup>13</sup>C NMR (CDCl<sub>3</sub>, 150 MHz): δ 182.8, 158.8, 151.8, 150.7, 125.4, 124.4, 115.5, 110.8, 26.1, 22.9; HRMS (ESI): *m/z* [M + Na<sup>+</sup>] calcd for C<sub>10</sub>H<sub>9</sub>NO<sub>2</sub>+Na<sup>+</sup> 198.0531, found 198.0528.

### 1-methyl-5-phenylindoline-2,3-dione (2q)

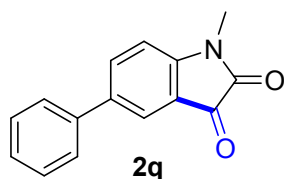

Yield 78%; red solid; mp. 182-184 °C; <sup>1</sup>H NMR (400 MHz, CDCl<sub>3</sub>): δ 7.85-7.82 (m, 2H), 7.54-7.51 (m, 2H), 7.47-7.44 (m, 2H), 7.40-7.37 (m, 1H), 6.98 (d, *J* = 8.0 Hz, 1H), 3.29 (s, 3H); <sup>13</sup>C NMR (CDCl<sub>3</sub>, 150 MHz): δ 183.3, 160.1, 150.5, 139.3, 137.2, 136.5, 129.2, 127.9, 126.6, 123.5, 117.8, 110.5, 26.4; HRMS (ESI): *m/z* [M + Na<sup>+</sup>] calcd for C<sub>15</sub>H<sub>11</sub>NO<sub>2</sub>+Na<sup>+</sup> 260.0687, found 260.0689.

### 5-(4-fluorophenyl)-1-methylindoline-2,3-dione (2r)

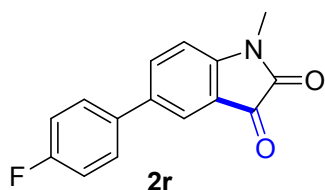

Yield 71%; red solid; mp. 136-139 °C; <sup>1</sup>H NMR (400 MHz, CDCl<sub>3</sub>): δ 7.79-7.75 (m, 2H), 7.50-7.46 (m, 2H), 7.16-7.11 (m, 2H), 6.98 (d, *J* = 8.0 Hz, 1H), 3.29 (s, 3H); <sup>13</sup>C NMR (CDCl<sub>3</sub>, 150 MHz): δ 183.3, 162.1 (d, *J*<sub>C-F</sub> = 246.8 Hz), 158.2, 150.4, 136.6, 136.3, 135.1, 128.2 (d, *J*<sub>C-F</sub> = 7.6 Hz), 123.5, 117.8, 115.9 (d, *J*<sub>C-F</sub> = 21.4 Hz), 110.3, 26.3; HRMS (ESI): *m/z* [M + Na<sup>+</sup>] calcd for C<sub>15</sub>H<sub>10</sub>FNO<sub>2</sub>+Na<sup>+</sup> 278.0593, found 278.0597.

### 5-(4-chlorophenyl)-1-methylindoline-2,3-dione (2s)

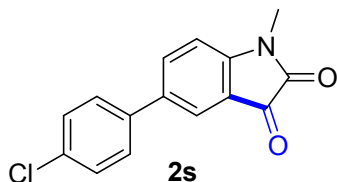

Yield 73%; red solid; mp. 180-182 °C; <sup>1</sup>H NMR (400 MHz, CDCl<sub>3</sub>): δ 7.80 (dd, *J*<sub>1</sub> = 1.6 Hz, *J*<sub>2</sub> = 8.0 Hz, 1H), 7.60 (d, *J* = 1.6 Hz, 1H), 7.46-7.40 (m, 4H), 6.98 (d, *J* = 8.0 Hz, 1H), 3.29 (s, 3H); <sup>13</sup>C NMR (CDCl<sub>3</sub>, 150 MHz): δ 183.2, 158.2, 150.6, 137.4, 136.6, 136.0, 134.0, 129.2, 127.8, 123.5, 117.8, 110.4, 26.4; HRMS (ESI): *m/z* [M + Na<sup>+</sup>] calcd for C<sub>15</sub>H<sub>10</sub>ClNO<sub>2</sub>+Na<sup>+</sup> 294.0298, found 294.0298.

### 5-(3-chlorophenyl)-1-methylindoline-2,3-dione (2t)

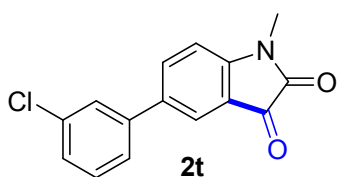

Yield 75%; red solid; mp. 188-189 °C; <sup>1</sup>H NMR (400 MHz, CDCl<sub>3</sub>): δ 7.81-7.78 (m, 2H), 7.49 (s, 1H), 7.39-7.35 (m, 3H), 6.98 (d, *J* = 8.0 Hz, 1H), 3.29 (s, 3H); <sup>13</sup>C NMR (CDCl<sub>3</sub>, 150 MHz): δ



183.2, 158.2, 150.8, 140.7, 136.7, 135.9, 135.0, 130.3, 127.9, 126.7, 124.7, 123.7, 117.9, 110.4, 26.4; HRMS (ESI):  $m/z$   $[M + Na^+]$  calcd for  $C_{15}H_{10}ClNO_2+Na^+$  294.0298, found 294.0294.

### 5-(3,5-dichlorophenyl)-1-methylindoline-2,3-dione (2u)

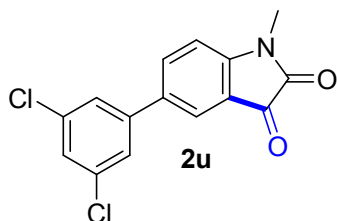

Yield 70%; red solid; mp. 228-230 °C;  $^1H$  NMR (400 MHz,  $CDCl_3$ ):  $\delta$  8.08 (dd,  $J_1 = 1.6$  Hz,  $J_2 = 8.4$  Hz, 1H), 7.94 (d,  $J = 1.6$  Hz, 1H), 7.79 (d,  $J = 1.2$  Hz, 2H), 7.57 (d,  $J = 1.2$  Hz, 1H), 7.24 (d,  $J = 8.4$  Hz, 1H), 3.18 (s, 3H);  $^{13}C$  NMR ( $CDCl_3$ , 150 MHz):  $\delta$  183.3, 158.6, 151.6, 142.3, 136.8, 134.9, 132.4, 127.0, 125.2, 122.9, 118.2, 111.3, 26.4; HRMS (ESI):  $m/z$   $[M + Na^+]$  calcd for  $C_{15}H_9Cl_2NO_2+Na^+$  327.9908, found 327.9911.

### 3-(1-methyl-2,3-dioxindolin-5-yl)benzonitrile (2v)

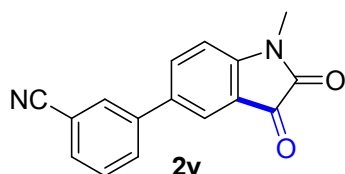

Yield 67%; red solid; mp. 236-237 °C;  $^1H$  NMR (400 MHz,  $CDCl_3$ ):  $\delta$  8.22 (s, 1H), 8.10-8.04 (m, 2H), 7.94 (d,  $J = 1.6$  Hz, 1H), 7.81 (d,  $J = 8.0$  Hz, 1H), 7.67-7.63 (m, 1H), 7.27 (d,  $J = 8.0$  Hz, 1H), 3.20 (s, 3H);  $^{13}C$  NMR ( $DMSO-d_6$ , 150 MHz):  $\delta$  183.4, 158.5, 151.4, 139.8, 136.6, 133.2, 131.2, 130.3, 130.1, 122.7, 118.9, 118.3, 112.3, 111.3, 26.4; HRMS (ESI):  $m/z$   $[M + Na^+]$  calcd for  $C_{16}H_{10}N_2O_2+Na^+$  285.0640, found 285.0638.

### 1-methyl-5-(thiophen-2-yl)indoline-2,3-dione (2w)

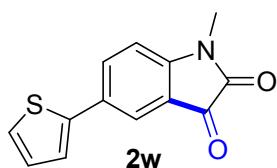

Yield 72%; red solid; mp. 206-208 °C;  $^1H$  NMR (400 MHz,  $CDCl_3$ ):  $\delta$  7.84 (d,  $J = 1.6$  Hz, 1H), 7.82 (s, 1H), 7.30 (dd,  $J_1 = 0.8$  Hz,  $J_2 = 4.0$  Hz, 1H), 7.27 (d,  $J = 2.4$  Hz, 1H), 7.10-7.08 (m, 1H), 6.92 (d,  $J = 8.8$  Hz, 1H), 3.28 (s, 3H);  $^{13}C$  NMR ( $CDCl_3$ , 150 MHz):  $\delta$  183.1, 158.1, 150.3, 142.3, 135.2, 130.9, 128.2, 125.3, 123.1, 122.4, 117.8, 103.1, 26.4; HRMS (ESI):  $m/z$   $[M + Na^+]$  calcd for  $C_{13}H_9NO_2S+Na^+$  266.0252, found 266.0250.

### *N*-methyl-2-oxo-*N*-phenylacetamide (3a) <sup>[2]</sup>

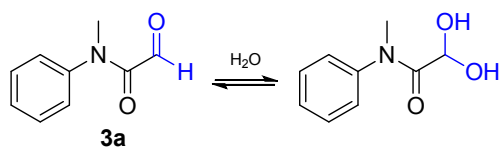

Yield 93%; canary yellow oil;  $^1\text{H NMR}$  (400 MHz,  $\text{CDCl}_3 + \text{D}_2\text{O}$ ):  $\delta$  7.47-7.37 (m, 3H), 7.32-7.21 (m, 2H), 4.93 (s, 0.6H), 3.41-3.27 (m, 3H).

***N*-ethyl-2-oxo-*N*-phenylacetamide (3b)** <sup>[2]</sup>

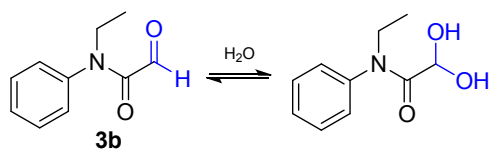

Yield 95%; canary yellow oil;  $^1\text{H NMR}$  (400 MHz,  $\text{CDCl}_3 + \text{D}_2\text{O}$ ):  $\delta$  7.46-7.38 (m, 3H), 7.28-7.18 (m, 2H), 4.84 (s, 0.46H), 3.89-3.68 (m, 2H), 1.21-1.08 (m, 3H).

***N*-(4-methoxyphenyl)-*N*-methyl-2-oxoacetamide (3c)** <sup>[2]</sup>

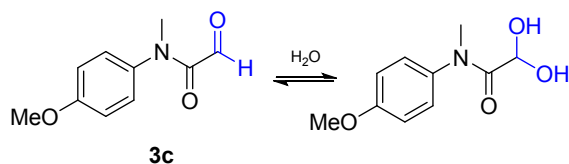

Yield 92%; canary yellow oil;  $^1\text{H NMR}$  (400 MHz,  $\text{CDCl}_3 + \text{D}_2\text{O}$ ):  $\delta$  9.38 (s, 0.27H), 7.21-7.12 (m, 2H), 6.95-6.92 (m, 2H), 3.83 (s, 3H), 3.37-3.23 (m, 3H).

***N*-(4-chlorophenyl)-*N*-methyl-2-oxoacetamide (3d)** <sup>[2]</sup>

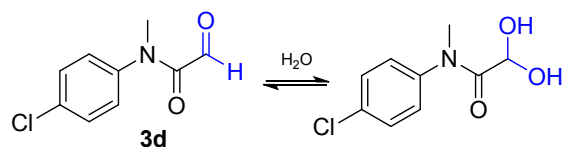

Yield 90%; canary yellow oil;  $^1\text{H NMR}$  (400 MHz,  $\text{CDCl}_3 + \text{D}_2\text{O}$ ):  $\delta$  7.42-7.40 (m, 2H), 7.27-7.21 (m, 2H), 4.97 (s, 0.53H), 3.48-3.25 (m, 3H).

***N*-methyl-2-oxo-*N*-(4-(thiophen-2-yl)phenyl)acetamide (3e)** <sup>[2]</sup>

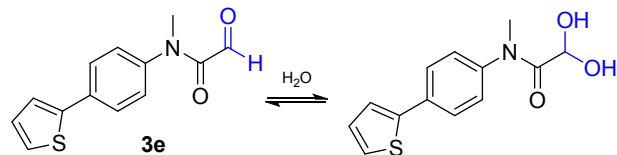

Yield 82%; canary yellow oil;  $^1\text{H NMR}$  (400 MHz,  $\text{CDCl}_3 + \text{D}_2\text{O}$ ):  $\delta$  7.67-7.62 (m, 2H), 7.58-7.52 (m, 1H), 7.51-7.30 (m, 2H), 7.25-7.18 (m, 1H), 7.15-7.08 (m, 1H), 3.42-3.26 (m, 3H).

***N*-methyl-*N*-(3'-nitro-[1,1'-biphenyl]-4-yl)-2-oxoacetamide (3f)** <sup>[2]</sup>

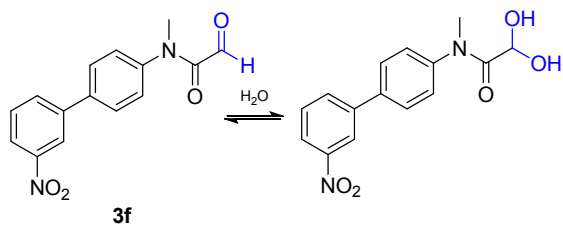

Yield 89%; canary yellow oil;  $^1\text{H}$  NMR (400 MHz,  $\text{CDCl}_3 + \text{D}_2\text{O}$ ):  $\delta$  8.45 (s, 1H), 8.25 (d,  $J=6.4$  Hz, 1H), 7.91 (d,  $J=5.2$  Hz, 1H), 7.73 (d,  $J=5.2$  Hz, 1H), 7.69 (d,  $J=6.4$  Hz, 1H), 7.66 (d,  $J=5.2$  Hz, 1H), 7.41 (d,  $J=6.4$  Hz, 1H), 7.33 (d,  $J=6.4$  Hz, 1H), 3.46-3.33 (m, 3H).

### 3. References

- [1] Miller, M.; Vogel, J. C.; Tsang, W.; Merrit, A.; Procter, D. J. *Org. Biomol. Chem*, **2009**, *7*, 589-597.
- [2] Tang, B. X.; Song, R. J.; Wu, C. Y.; Liu, Y.; Zhou, M. B.; Wei, W. T.; Deng, G. B.; Yin, D. L.; Li, J. H. *J. Am. Chem. Soc.* **2010**, *132*, 8900-8902.

## 4. $^1\text{H}$ NMR and $^{13}\text{C}$ NMR Spectra of Products

CP-0714-3 H1 CDCl3 2015-7-14  
Pulse Sequence: s2pu1

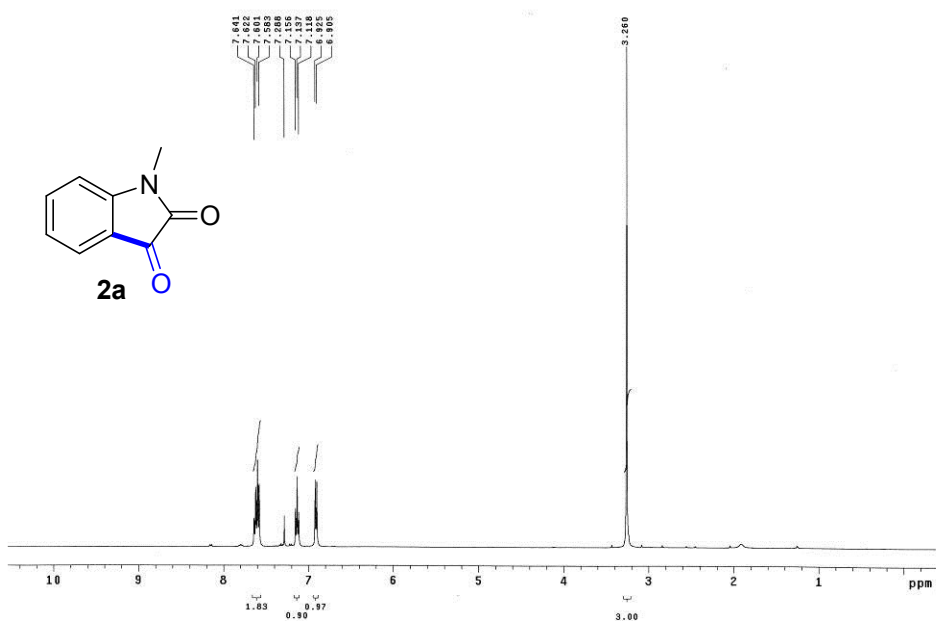

CP-0714-3-CDCl3-C13-2015-7-17  
Archive directory: /home/vmr1/vmrsys/data  
Sample directory: OneProbe\_calib\_20140603\_05  
Pulse Sequence: s2pu1

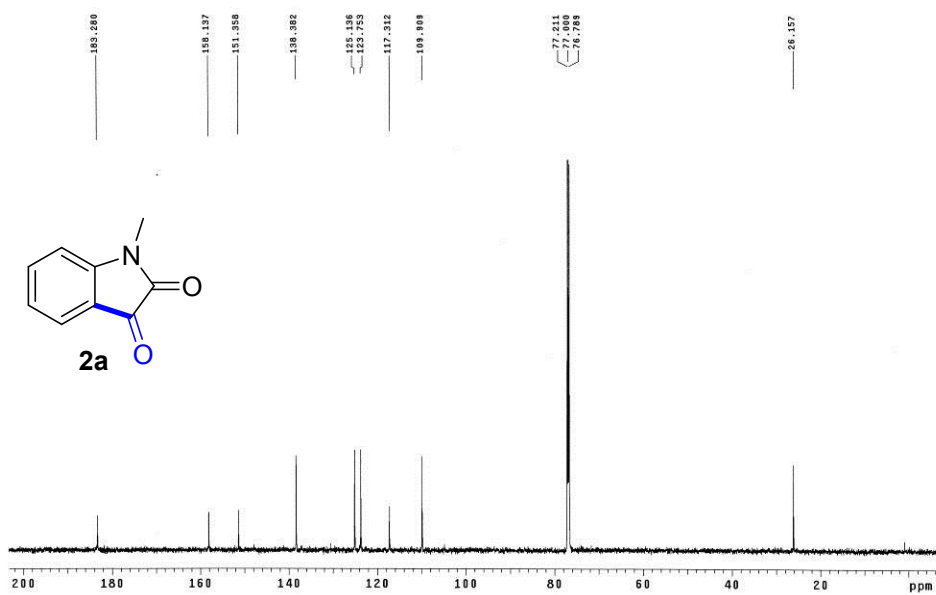

LJ-11 H1 CDC13 2015-7-2  
Pulse Sequence: s2pu1

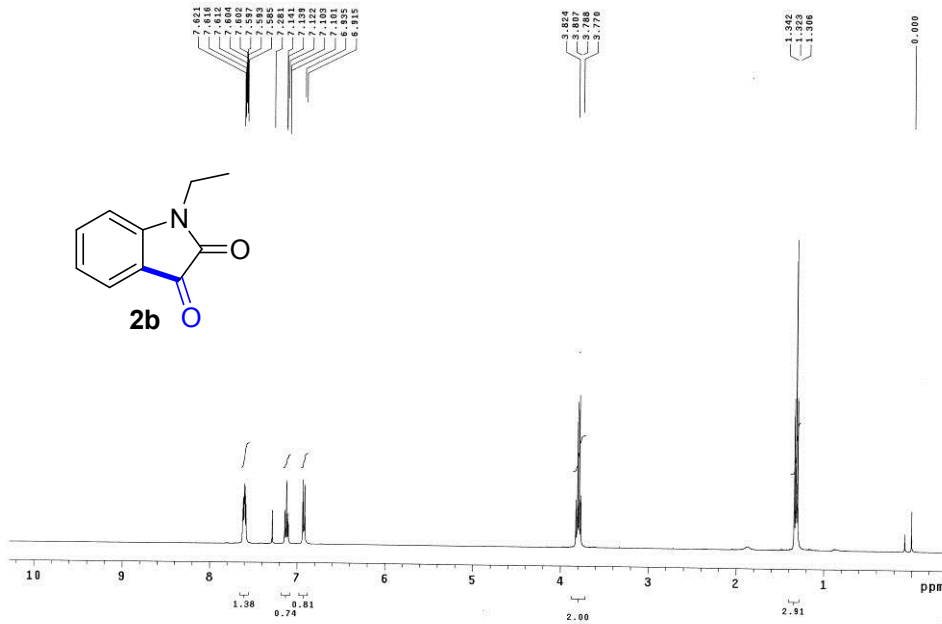

LJ-19 H1 CDC13 2015-7-6  
Pulse Sequence: s2pu1

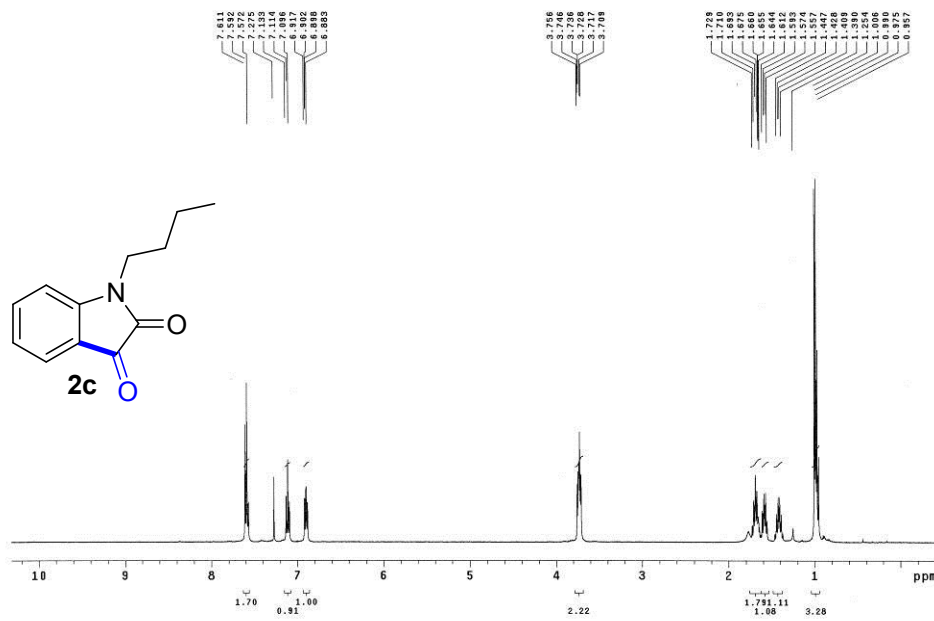

LJ20150714A H1 CDCl3 2015-7-14  
Archive directory: /home/vmr1/vmrsys/data  
Sample directory: OneProbe\_calib\_20140603\_05  
Pulse Sequence: s2pu1

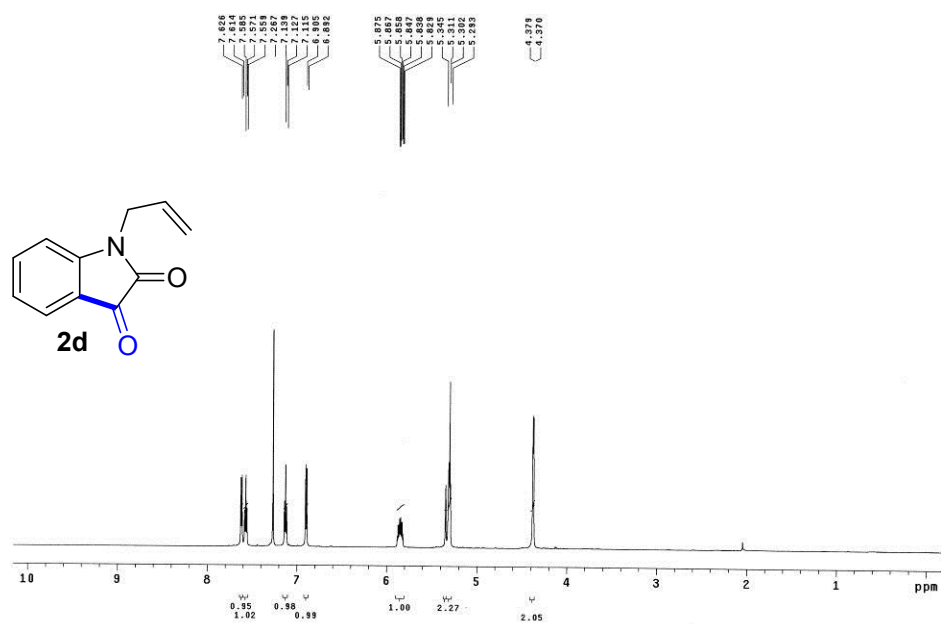

LJ20150714A-CDCl3-C13-2015-7-15  
Archive directory: /home/vmr1/vmrsys/data  
Sample directory: OneProbe\_calib\_20140603\_05  
Pulse Sequence: s2pu1

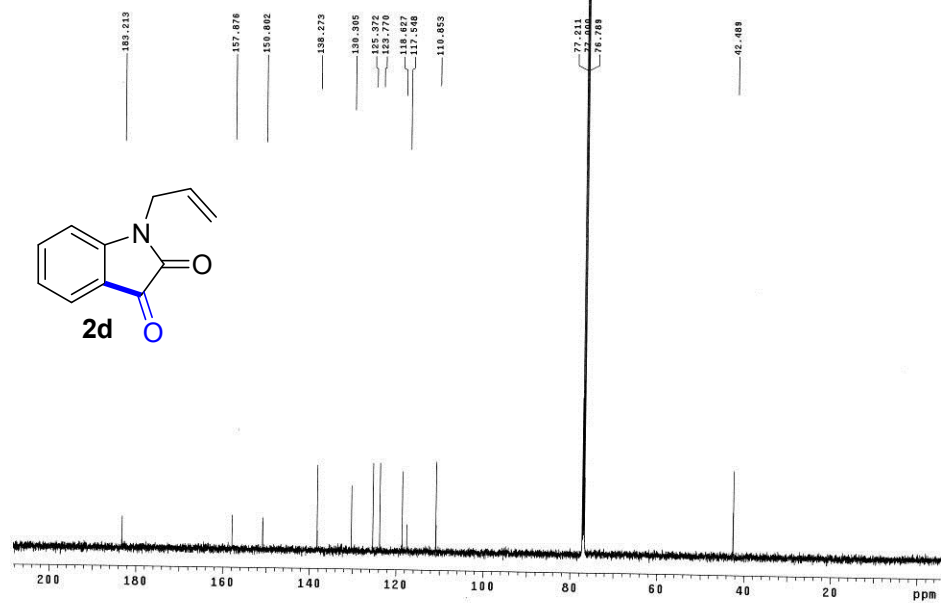

LJ-10 H1 CDC13 2015-7-2  
Pulse Sequence: s2pul

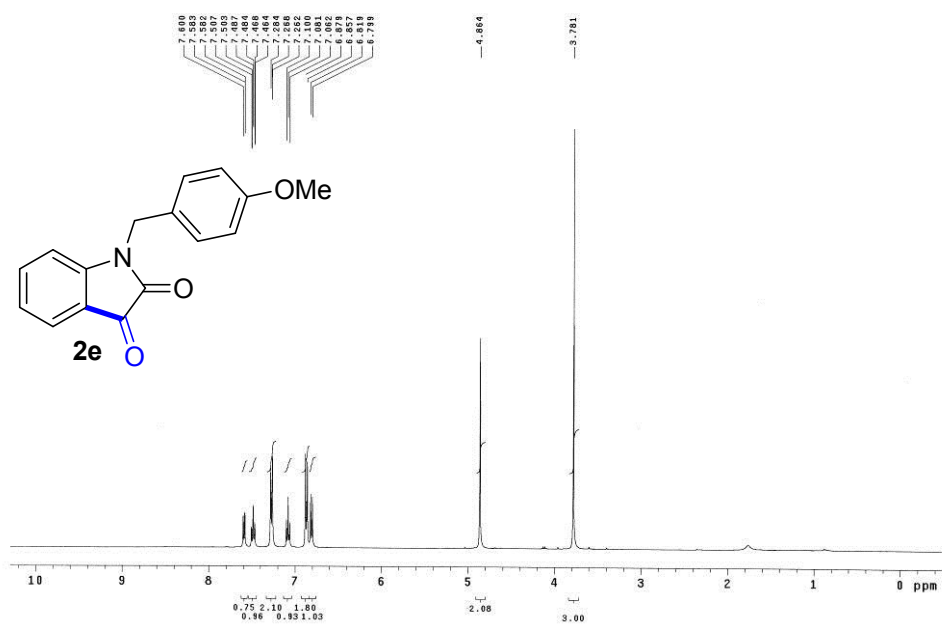

CP-0713-1-CDCL3-C13-2015-7-17  
Archive directory: /home/vmrl/vmrsys/data  
Sample directory: OneProbe\_calib\_20140603\_05  
Pulse Sequence: s2pul

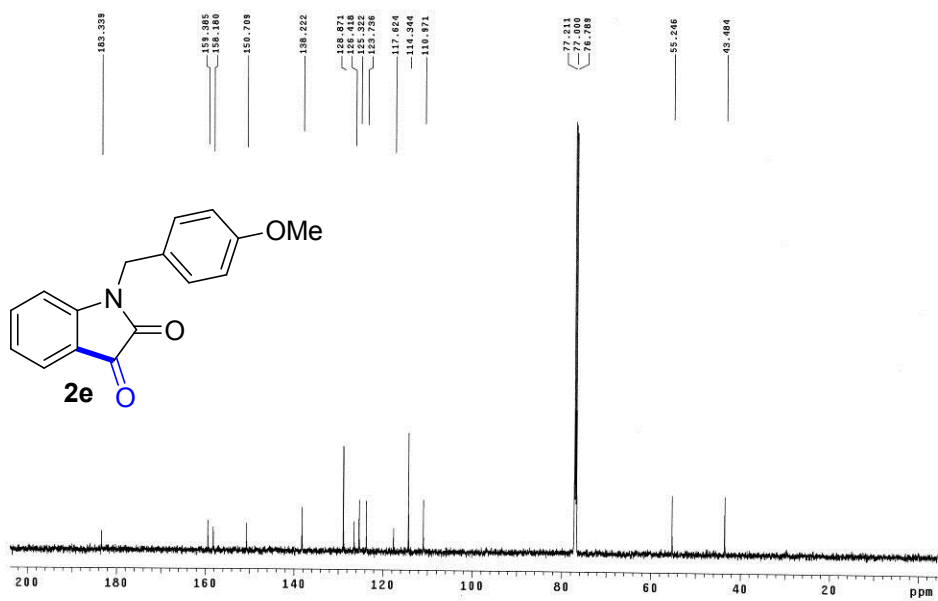



LJ-06 H1 CDC13 2015-6-29  
Pulse Sequence: s2pul

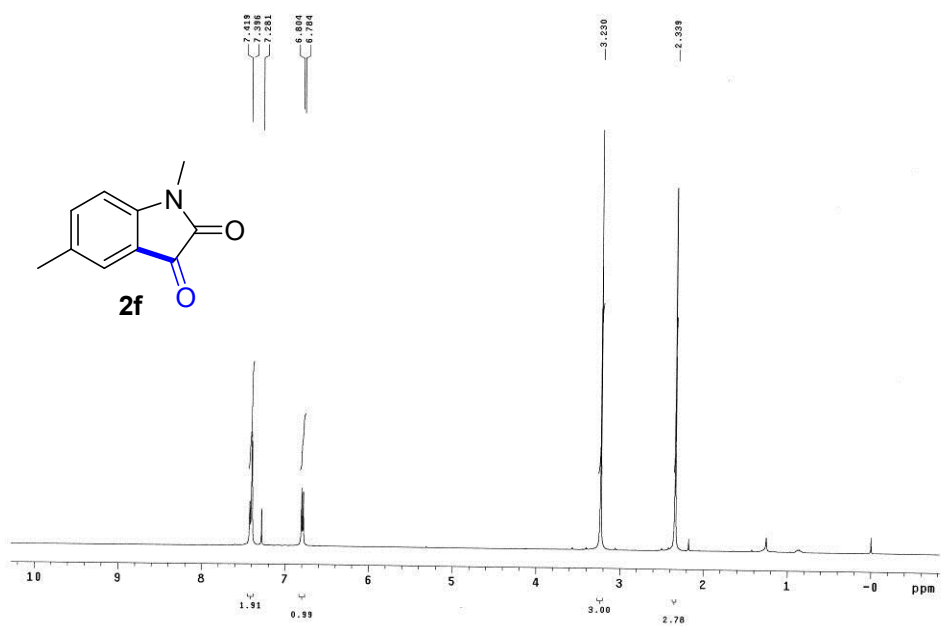

LJ20150506 H1 CDC13 2015-5-6  
Pulse Sequence: s2pul

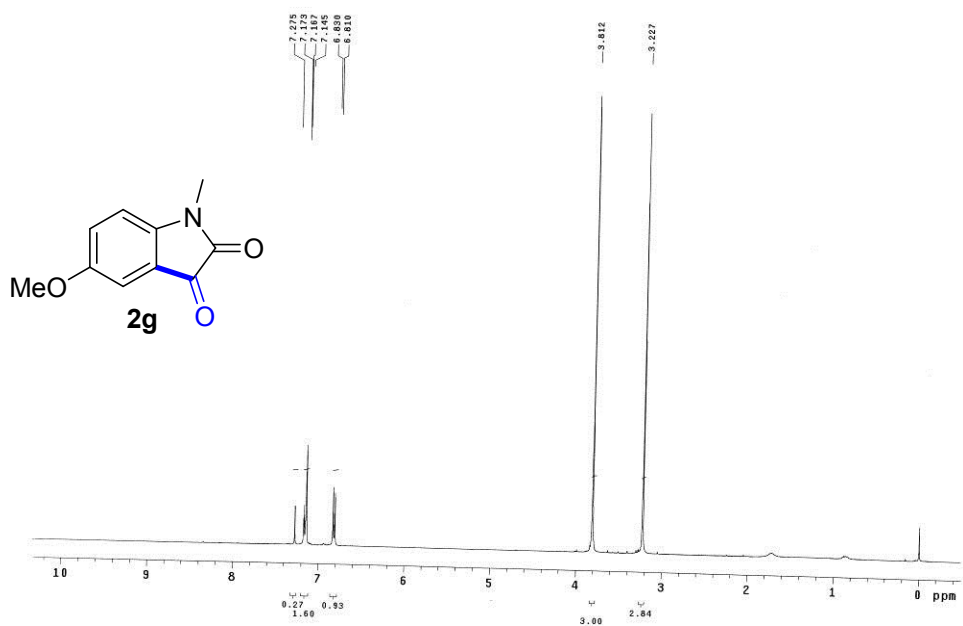

LJ20150507 H1 CDC13 2015-5-7  
Pulse Sequence: s2pu1

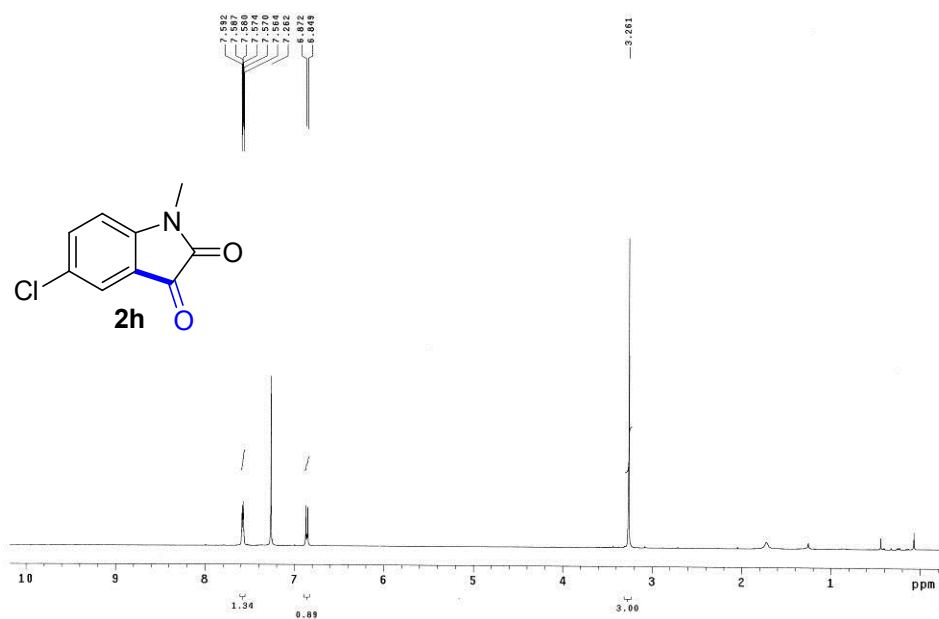

LJ-01 H1 CDC13 2015-6-29  
Pulse Sequence: s2pu1

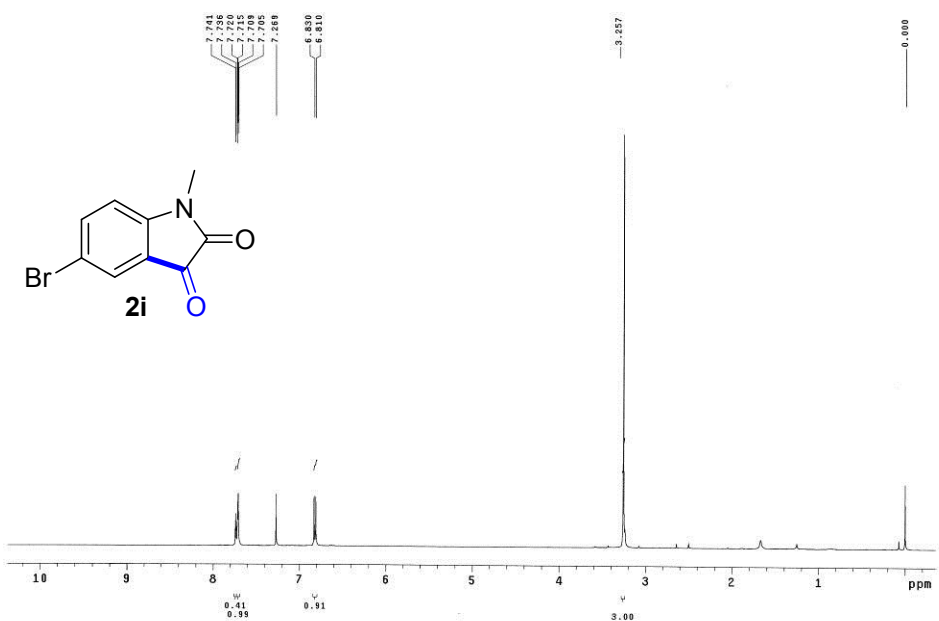

CP-0713-4-CDCL3-C13-2015-7-17  
Archive directory: /home/vmr1/vmarsys/data  
Sample directory: OneProbe\_calib\_20140603\_05  
Pulse Sequence: s2pu1

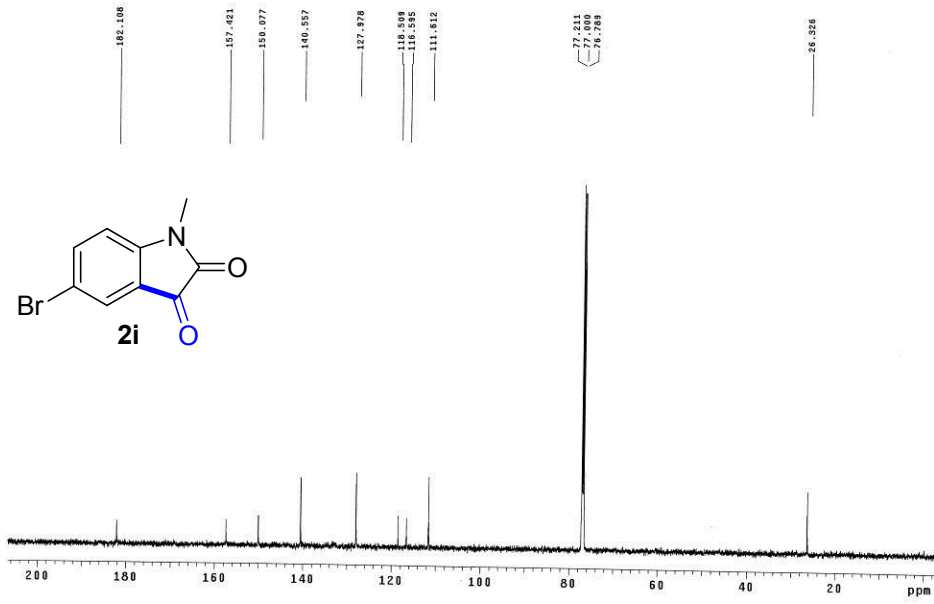

LJ-07 H1 CDCl3 2015-6-29  
Pulse Sequence: s2pu1

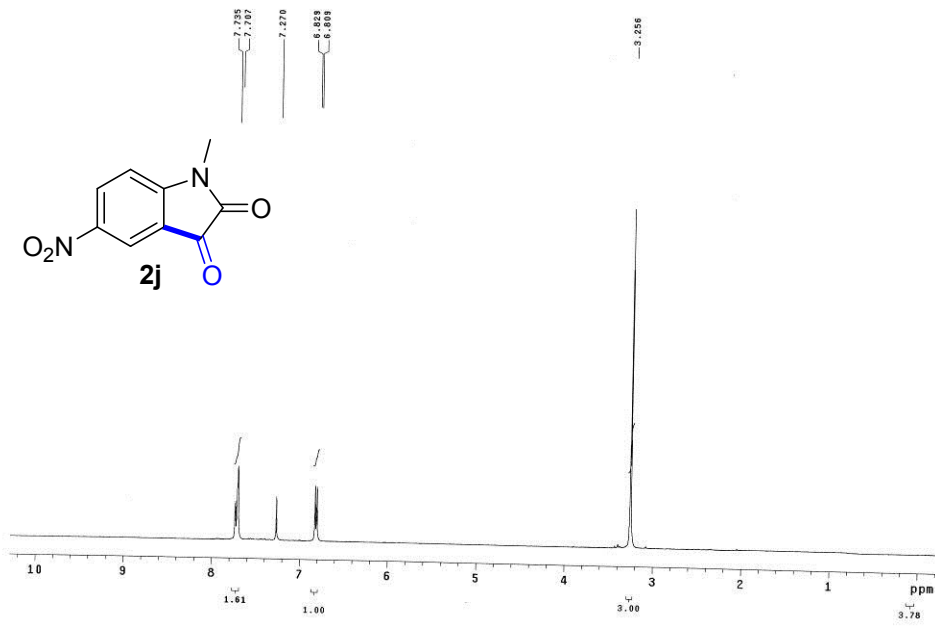

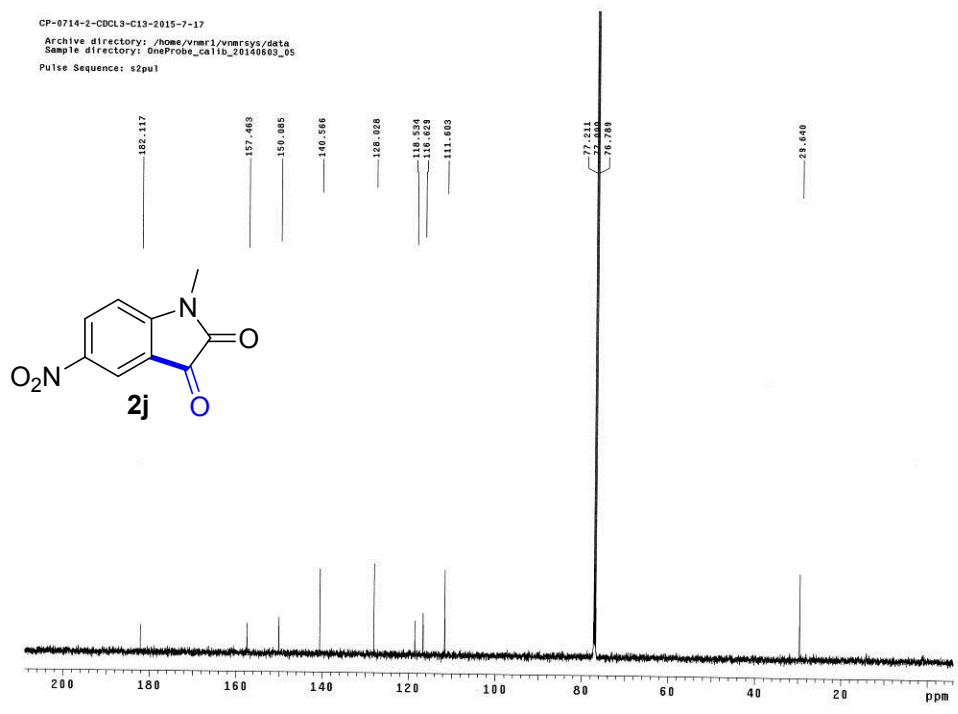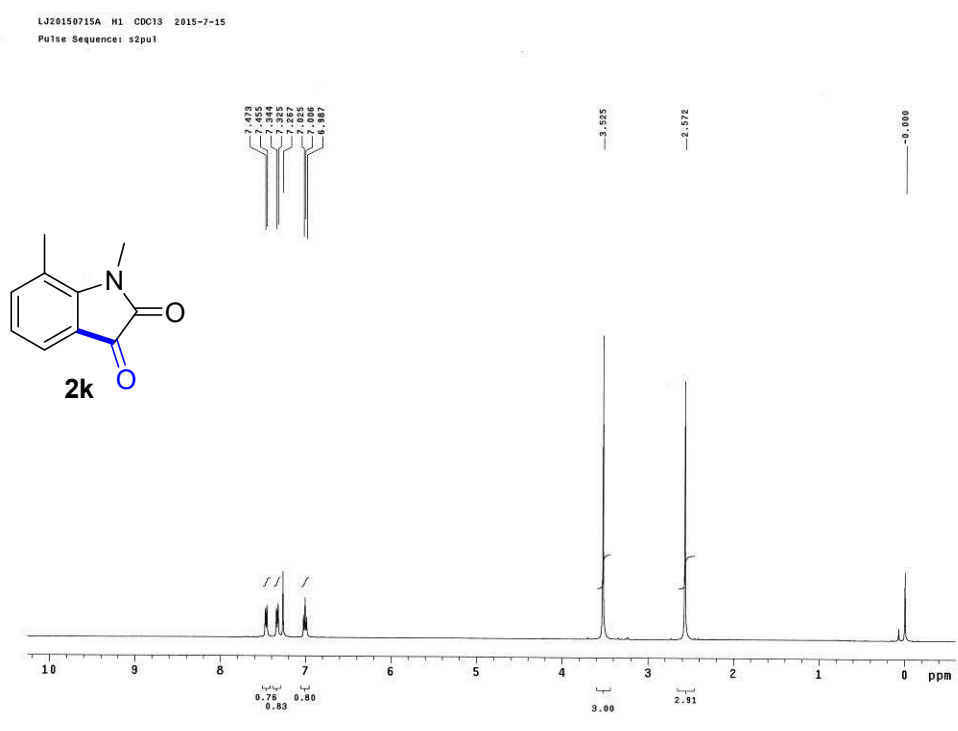

LJ-03 H1 CDCl3 2015-6-29  
Pulse Sequence: s2pu1

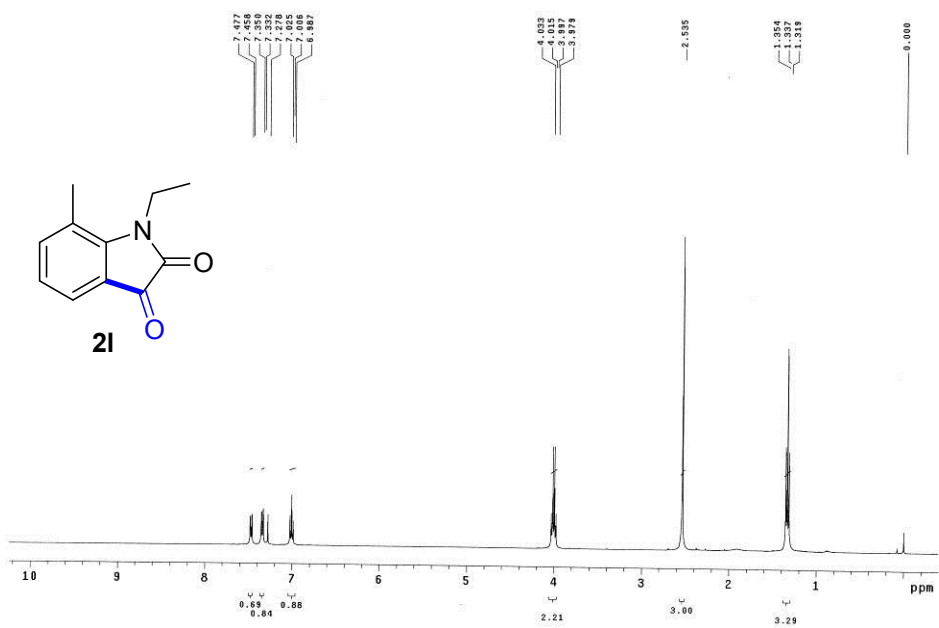

CP-0713-3-CDCL3-C19-2015-7-17  
Archive directory: /home/vmr1/vmr/sys/data  
Sample directory: OneProbe\_calib\_20140603\_05  
Pulse Sequence: s2pu1

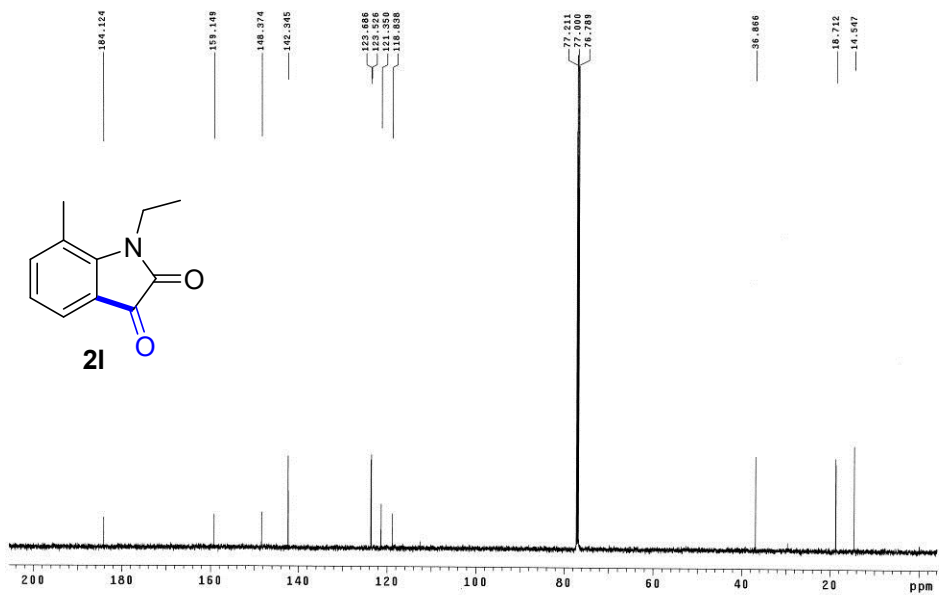

LJ-14-CDCL3-H1-2015-7-7  
Pulse Sequence: s2pu1

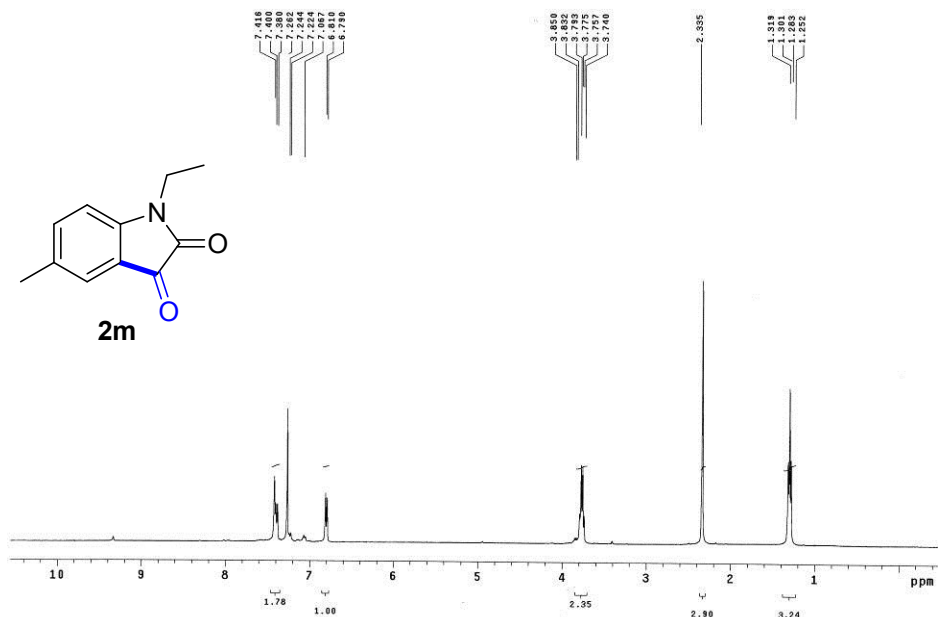

ZZ-08 H1 CDC13 2015-6-2  
Pulse Sequence: s2pu1

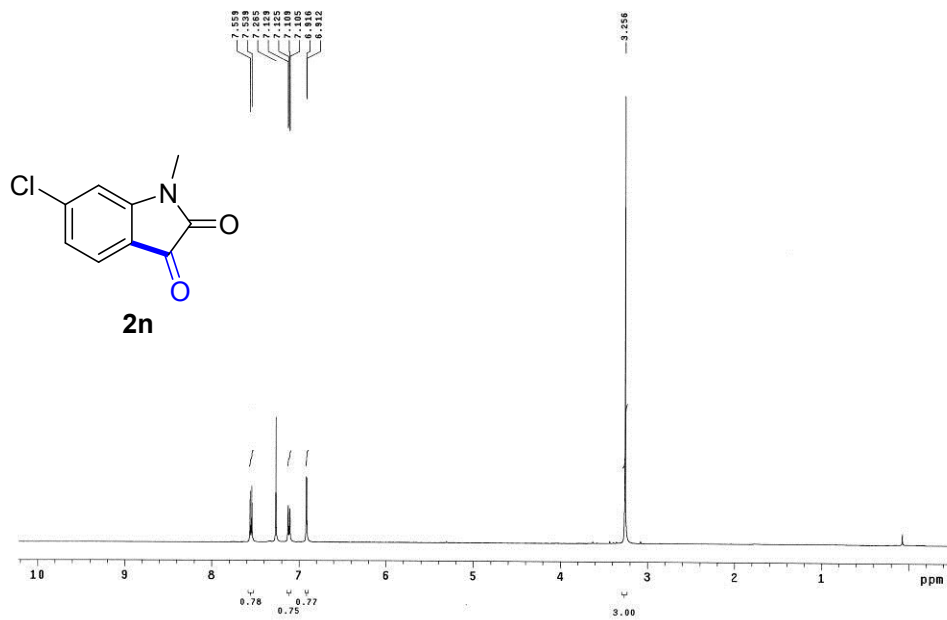

CP-0714-1-CDCL3-Cl3-2015-7-17  
Archive directory: /home/vmr1/vmrpy/data  
Sample directory: OneProbe\_calib\_20140603\_05  
Pulse Sequence: s2pu1

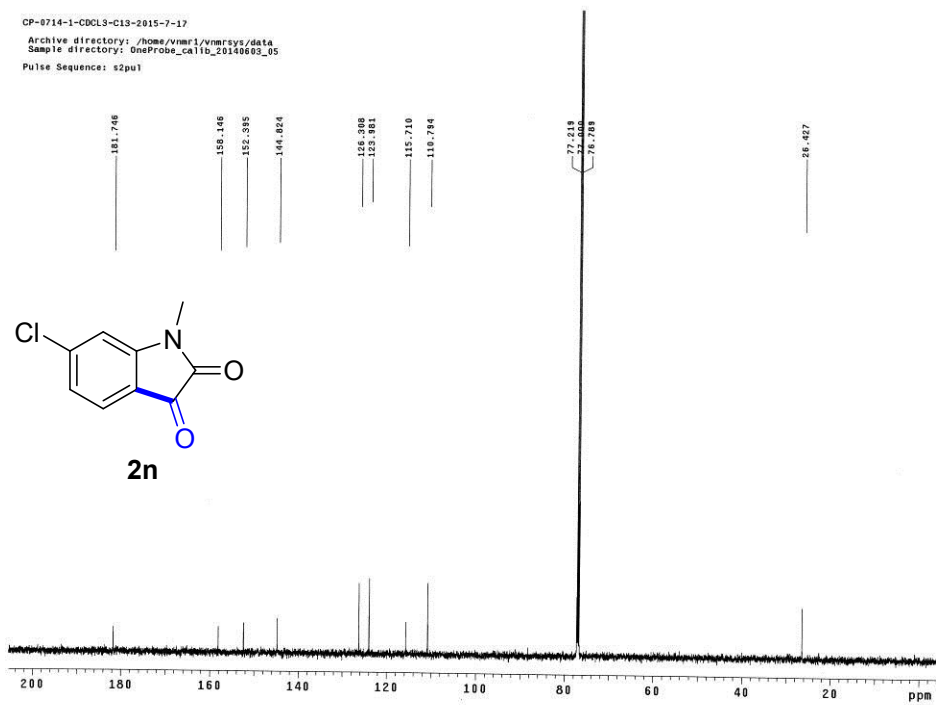

ZZ-09 H1 CDCl3 2015-6-2  
Pulse Sequence: s2pu1

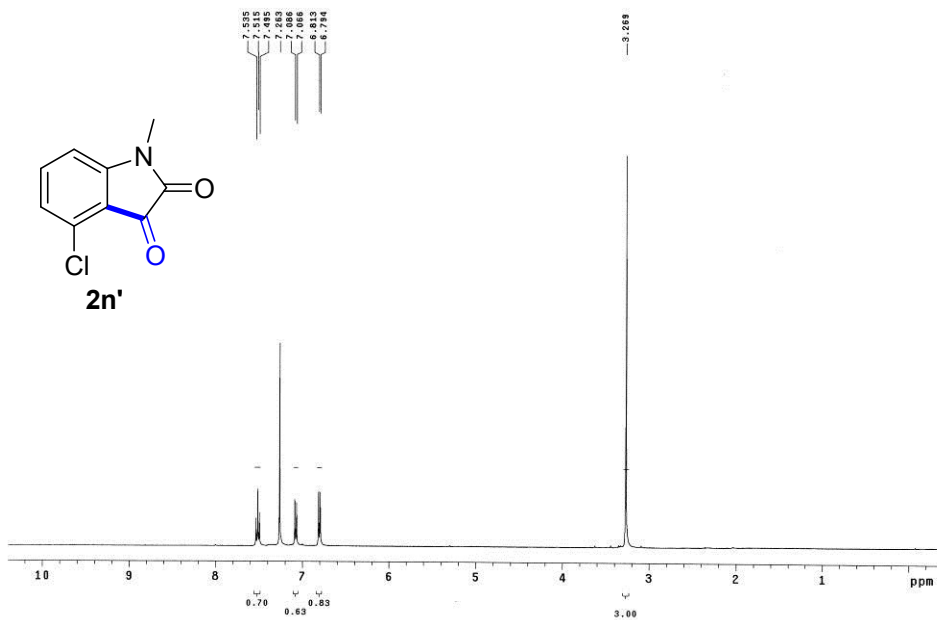

LJ-04 H1 CDC13 2015-6-29  
Pulse Sequence: s2pu1

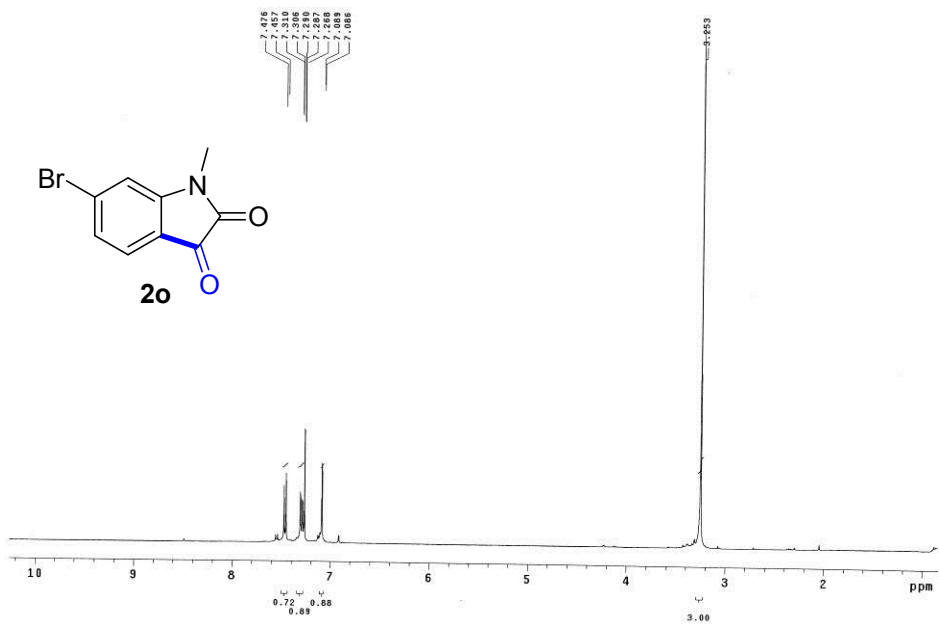

LJ20150715B H1 CDC13 2015-7-15  
Archive directory: /home/vmrc1/nmr/sys/data  
Sample directory: OneProbe\_ca11b\_20140603\_05  
Pulse Sequence: s2pu1

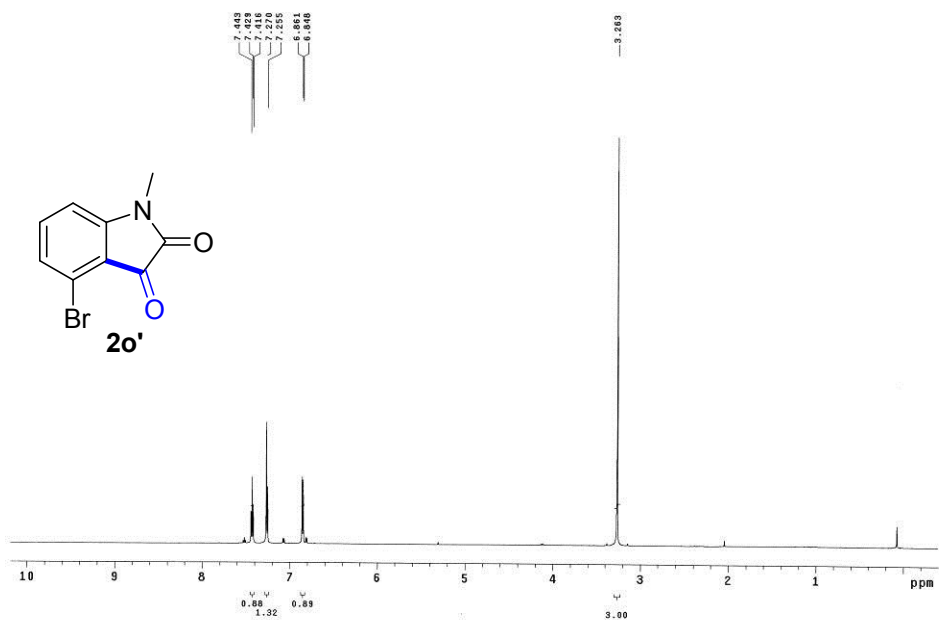



ZZ-10 M1 CDC13 2015-6-8  
Pulse Sequence: s2pu1

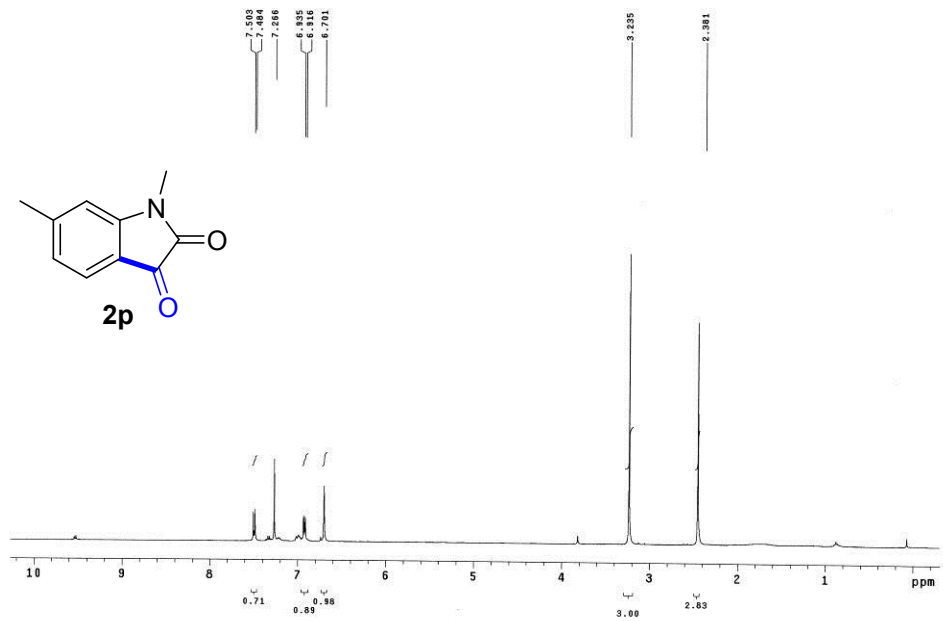

CP-0713-2-CDCL3-C13-2015-7-17  
Archive directory: /home/vmri/vmrsys/data  
Sample directory: OneProbe\_cal1b\_20140603\_05  
Pulse Sequence: s2pu1

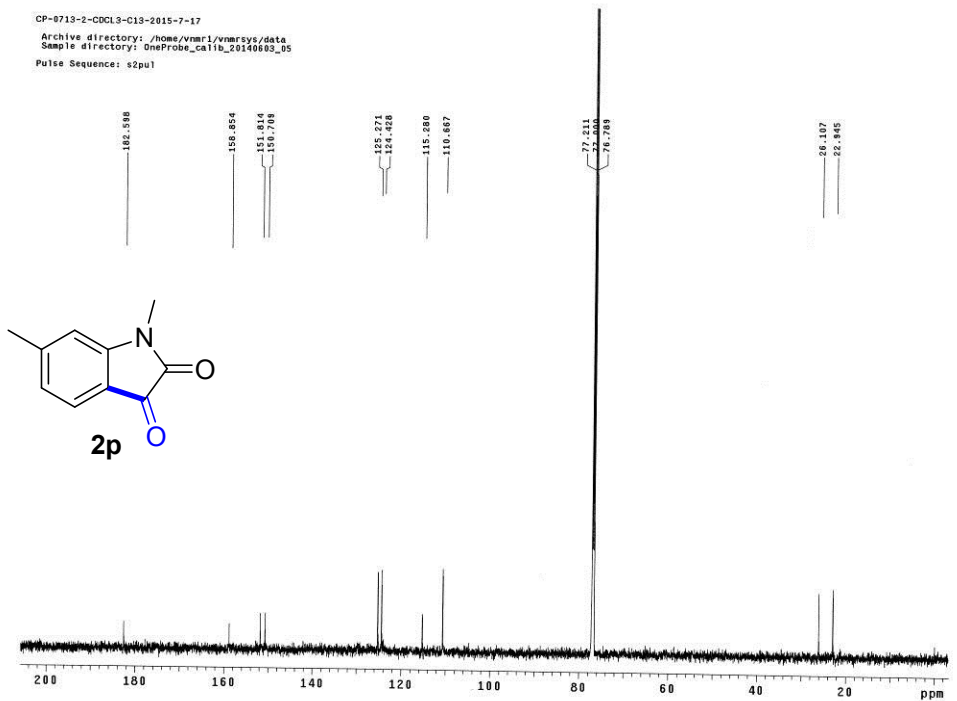

ZZ-11 H1 CDC13 2015-6-9  
Pulse Sequence: s2pu1

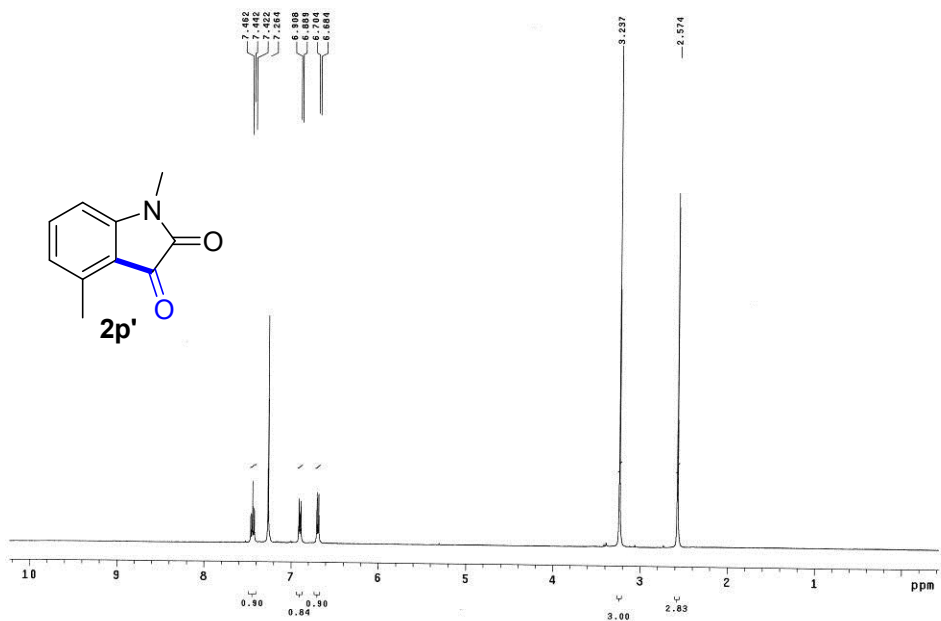

LJ-13 H1 CDC13 2015-7-2  
Pulse Sequence: s2pu1

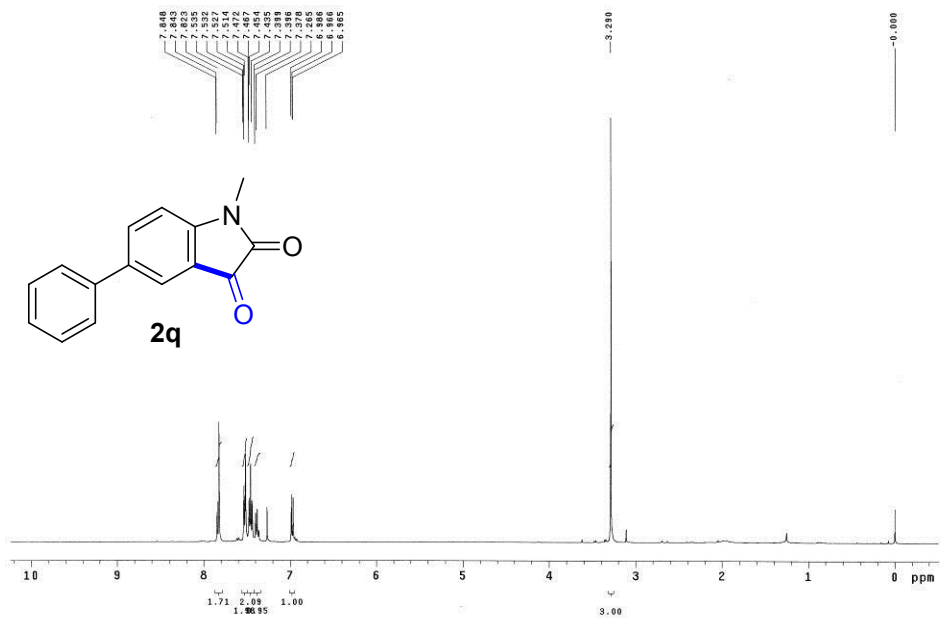

LJ-9 H1 CDC13 2015-7-2  
Pulse Sequence: s2pu1

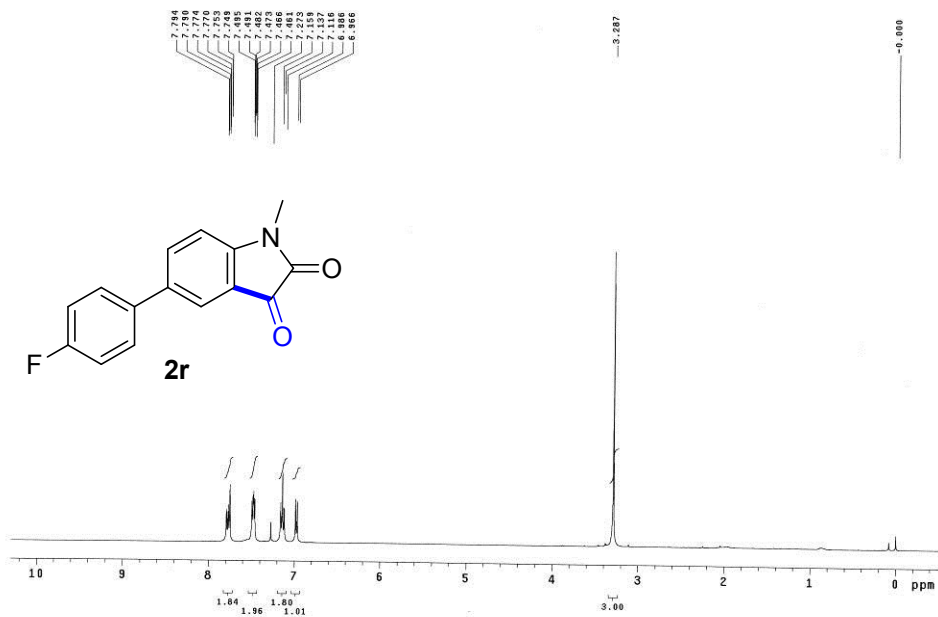

LJ-09-CDCL3-C13-2015-7-3  
Archive directory: /home/vmr1/vmr/sys/data  
Sample directory: OneProbe\_calib\_20140603\_05  
Pulse Sequence: s2pu1

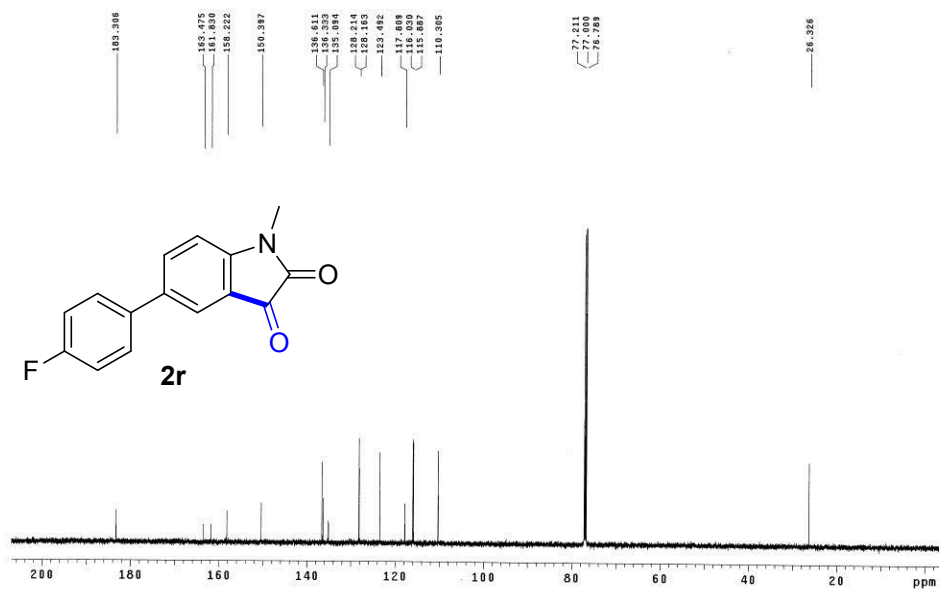

LJ-15 H1 CDC13 2015-7-7  
Pulse Sequence: s2pu1

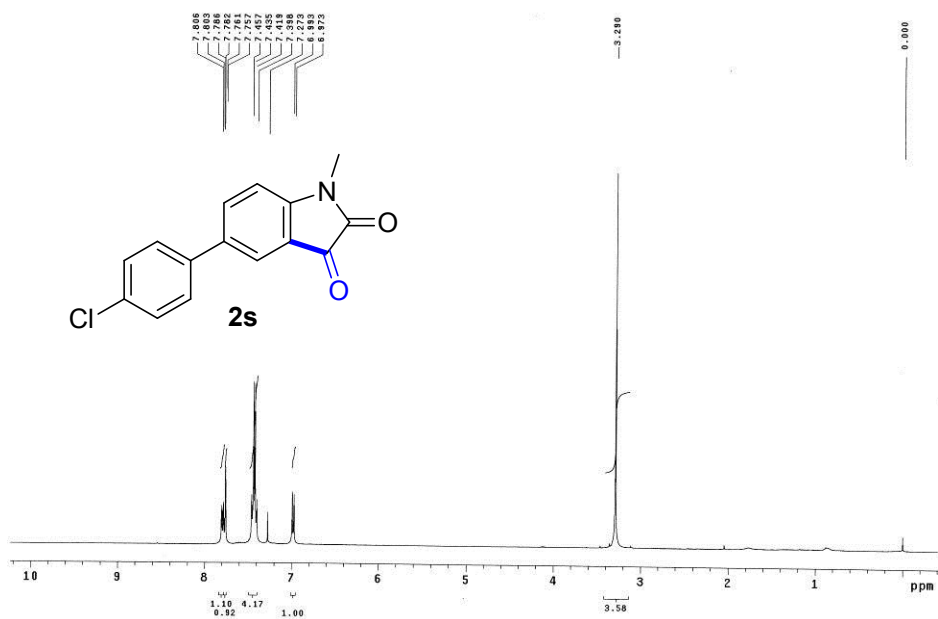

LJ-15-CDCl3-Cl3-2015-7-9  
Archive directory: /home/vnari/vmrsys/data  
Sample directory: OneProbe\_calib\_20140605\_05  
Pulse Sequence: s2pu1

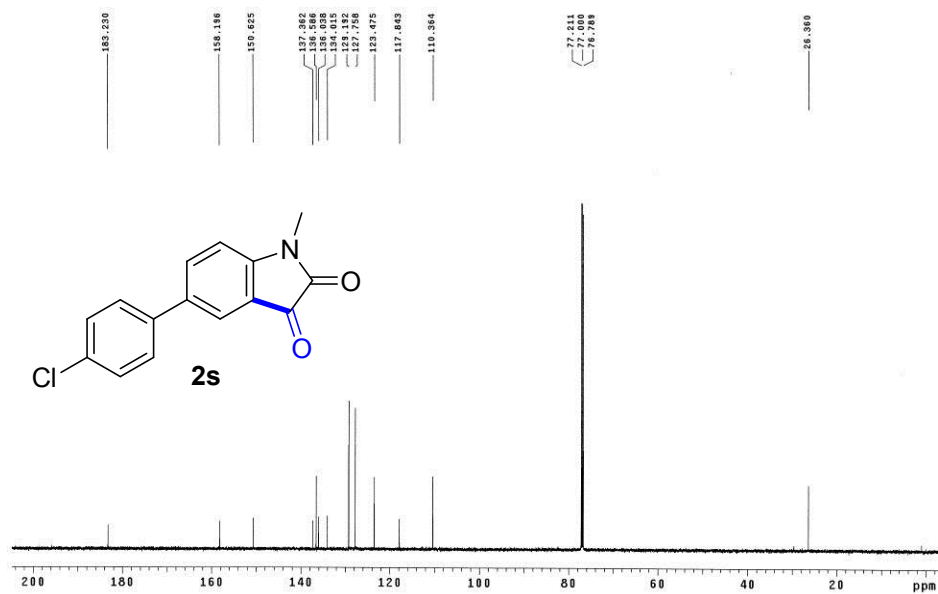

L3-17-CDCL3-H1-2015-7-7  
Pulse Sequence: s2pu1

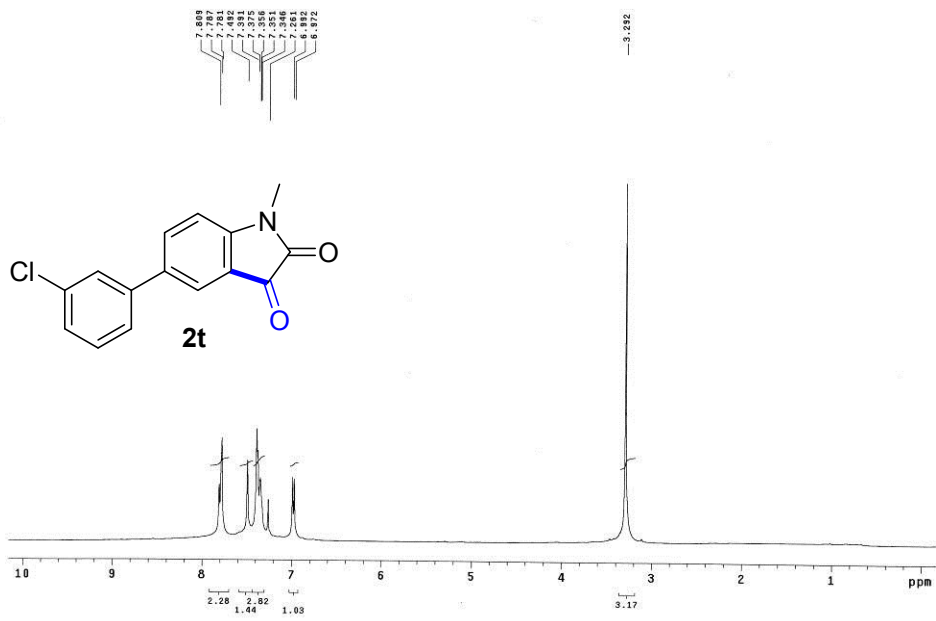

L3-17-CDCL3-Cl3-2015-7-9  
Archive directory: /home/vnmr1/vnmrsys/data  
Sample directory: OneProbe\_cal119\_20140605\_05  
Pulse Sequence: s2pu1

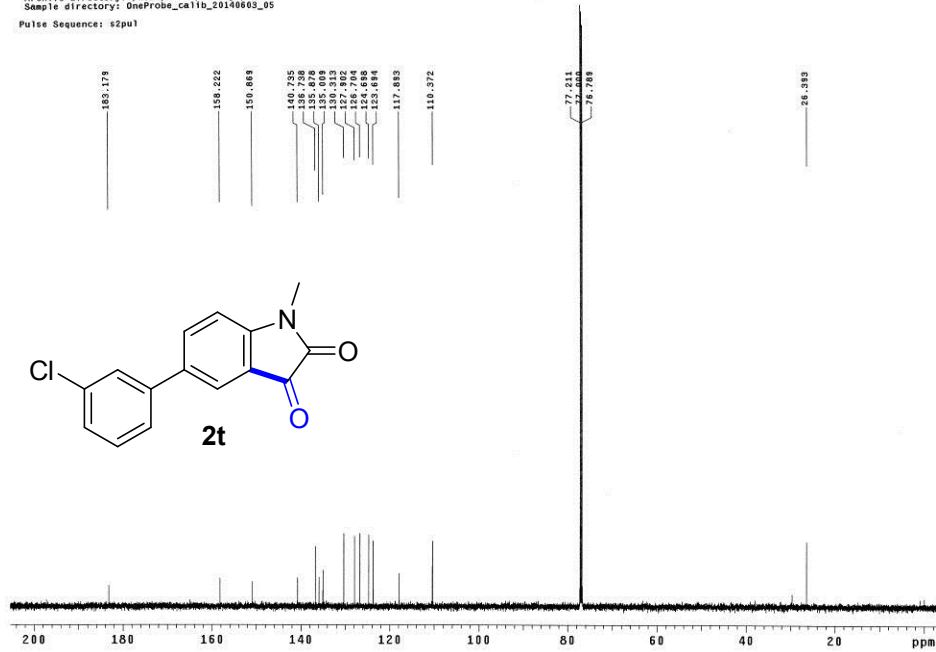

LJ-08 H1 DMSO 2015-7-2  
Pulse Sequence: s2pu1

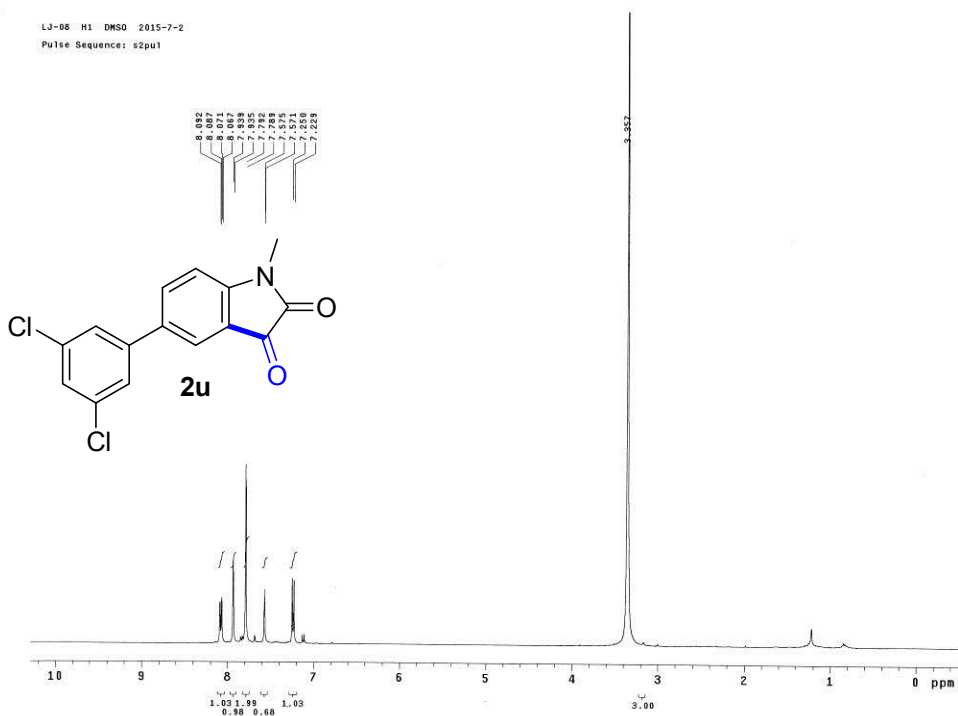

LJ-08-DMSO-C13-2015-7-3  
Archive directory: /home/vmr1/vmr/sys/data  
Sample directory: oneProbe\_calib\_Z0140603\_05  
Pulse Sequence: s2pu1

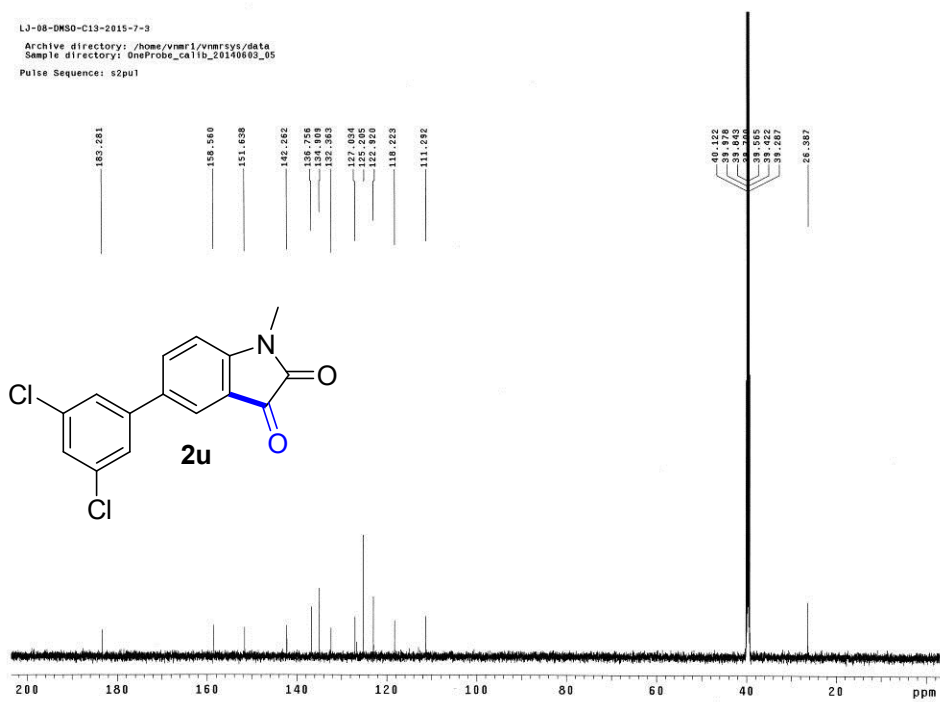

LJ-12 H1 DMSO 2015-7-2  
Pulse Sequence: szpu1

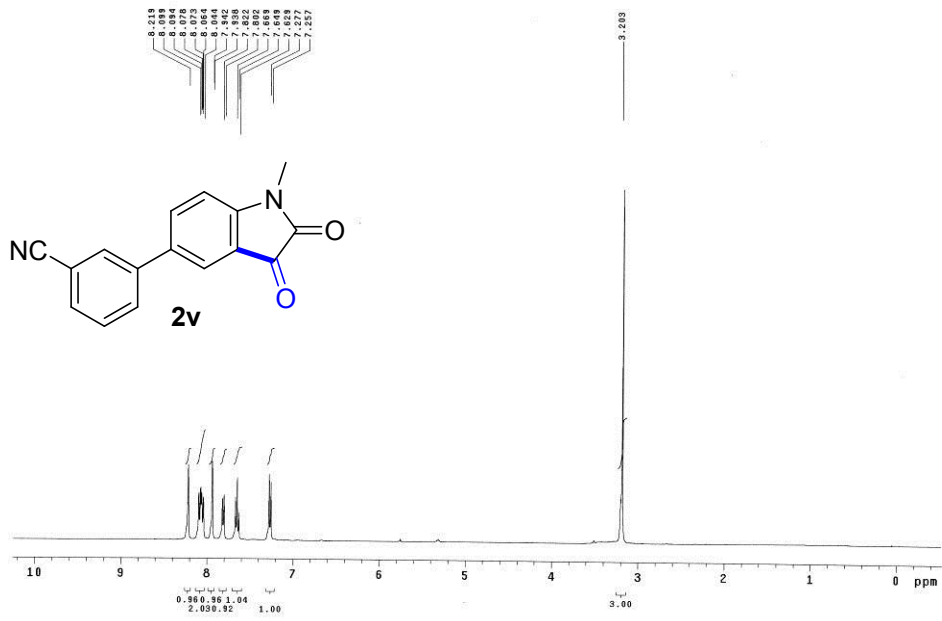

LJ-12-DMSO-C13-2015-7-3  
Archive directory: /home/vmr1/vmr/sys/data  
Sample directory: OneProbe\_calib\_20140603\_05  
Pulse Sequence: szpu1

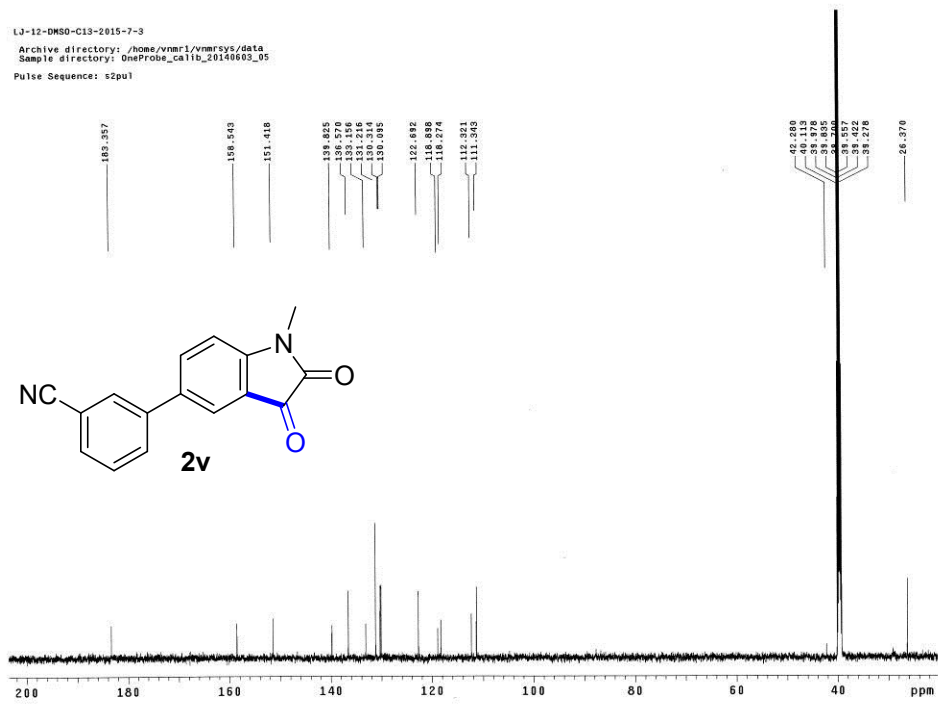

LJ-16 H1 CDC13 2015-7-7  
Pulse Sequence: s2pu1

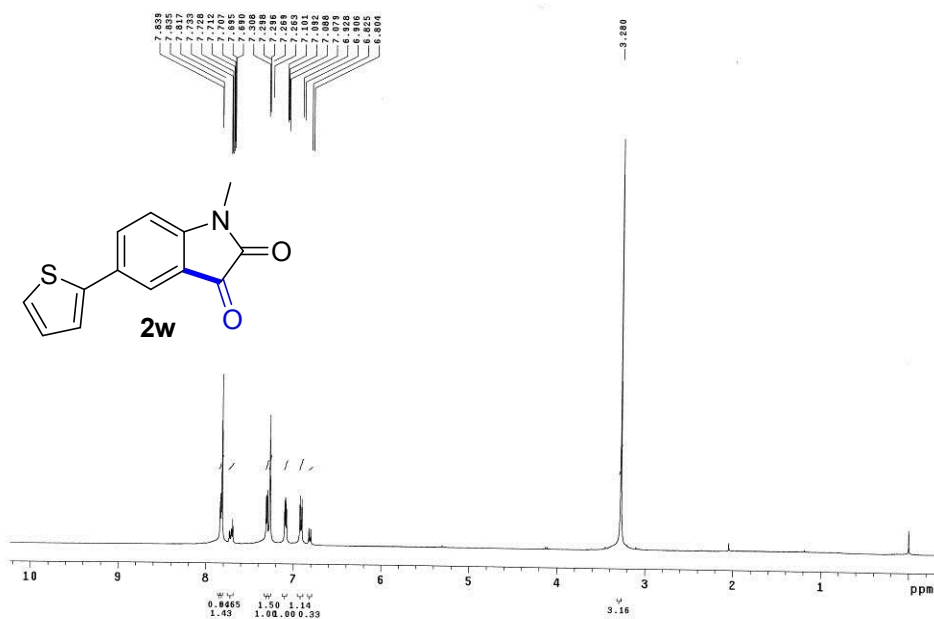

CX20150814A H1 CDC13+D2O 2015-8-14  
Pulse Sequence: s2pu1

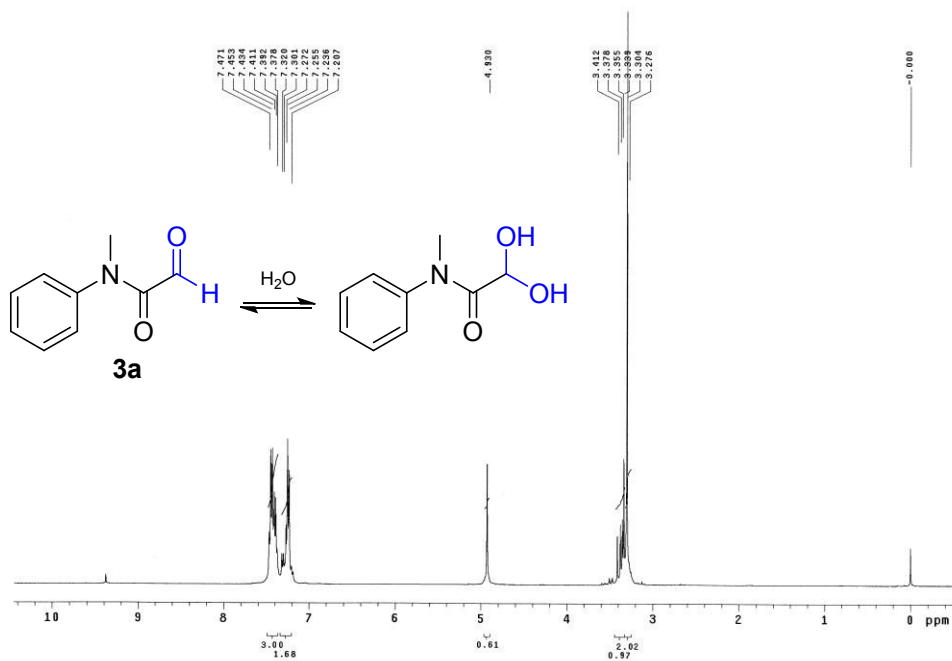



LJ26150901 H1 CDC13+D20 2015-9-14  
Pulse Sequence: s2pu1

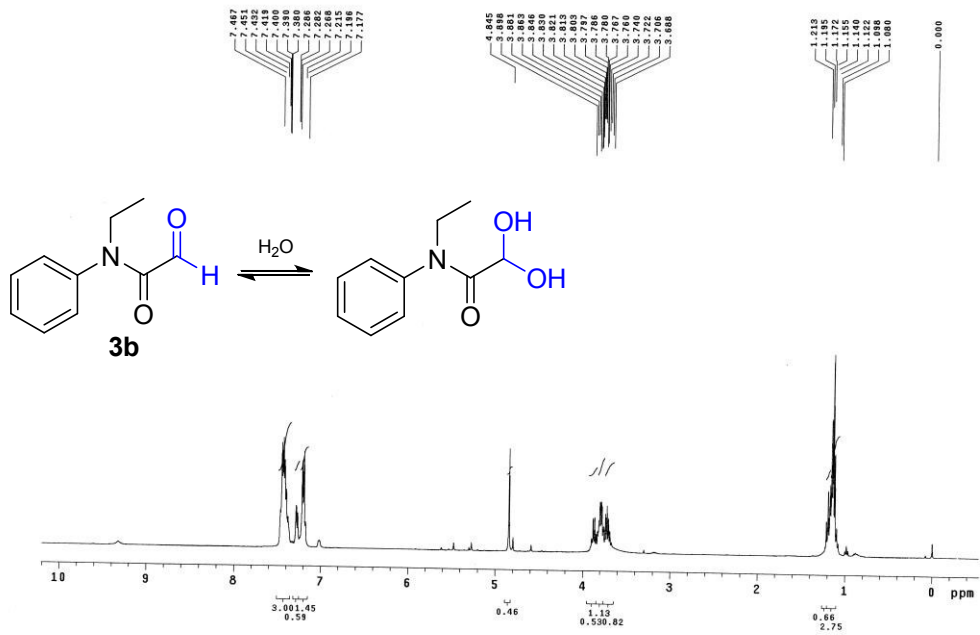

LJ1506058 H1 CDC13+D20 2015-9-14  
Pulse Sequence: s2pu1

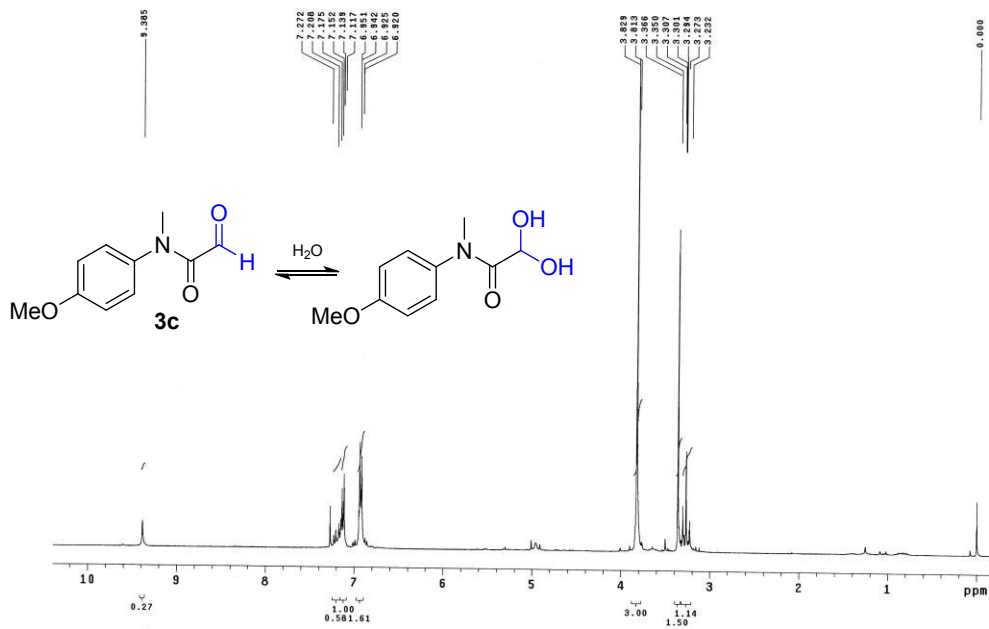

CX20150914B H1 CDC13+D20 2015-9-14  
Pulse Sequence: s2pu1

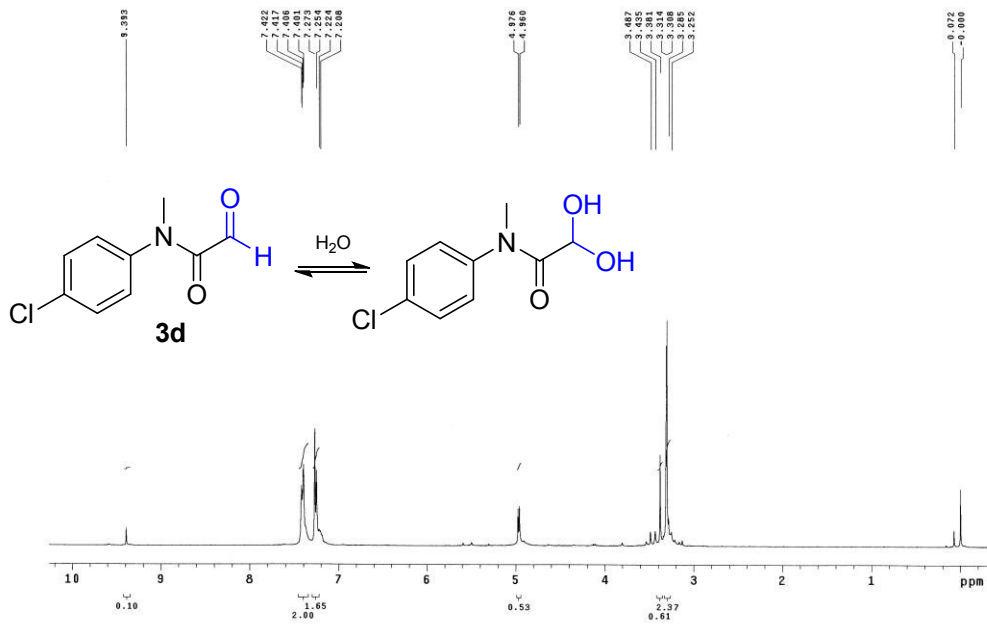

CX20150914C H1 CDC13+D20 2015-9-14  
Pulse Sequence: s2pu1

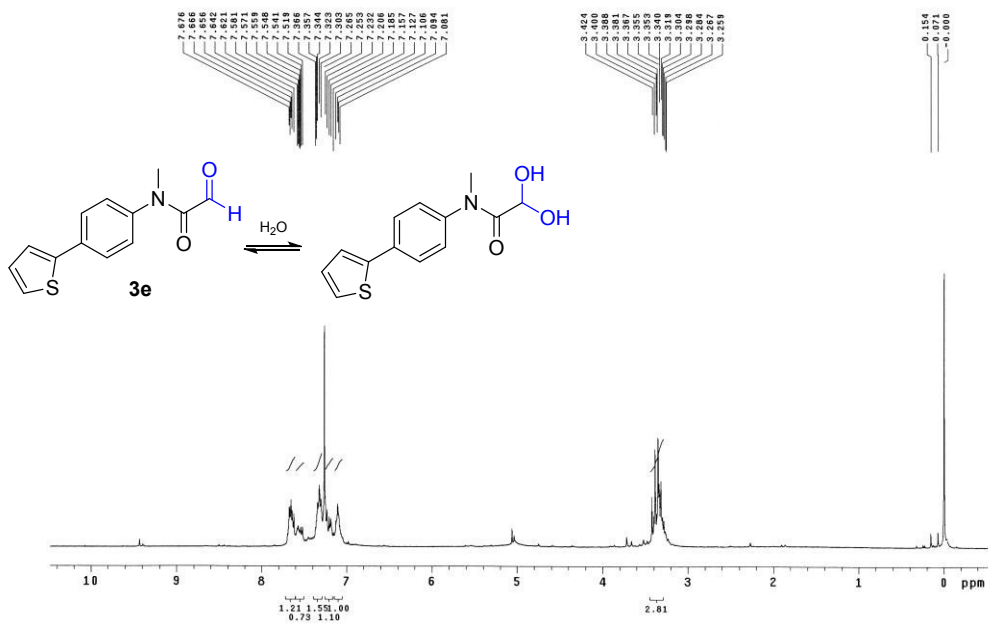

ZZZCP-01 H1 CDC13+020 2015-9-14  
Archive directory: /home/vmr1/vmrsys/data  
Sample directory: OneProbe\_calib\_20140603\_05  
Pulse Sequence: s2pu1

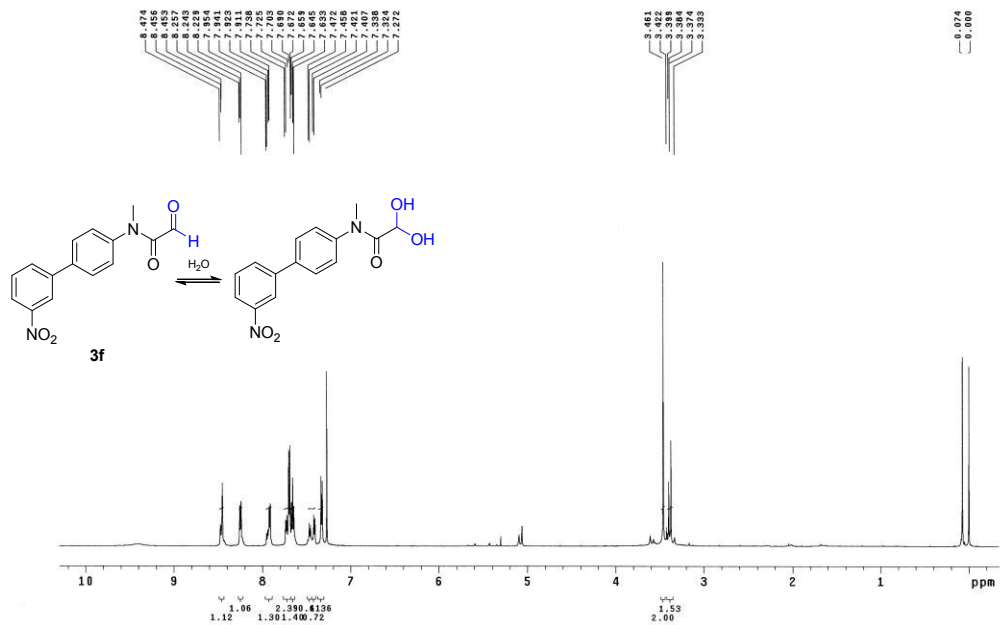

Supplement: c5ra25036f1.pdf [file c5ra25036f1.pdf]
